# Supplementary material for: Seipin luminal domain is dispensable in establishing functional ER sites of lipid droplet biogenesis
Source: Research Square preprint supplement (doi:10.21203/rs.3.rs-3951315/v1), 2024-10-21
Supplement: Supplementary file 2 [file b948803fcf713d3ff91c302f.xlsx]

## Sheet: Figure 2D and 2E
	Figure 2D								Figure 2E
	Number of droplets								Diameter of droplets
		WT	fld1Δ	fld1Δ + pFld1	fld1Δ + pFld1-ΔLR				WT	fld1Δ	fld1Δ + pFld1	fld1Δ + pFld1-ΔLR
	No. of Cells	Droplets	Droplets	Droplets	Droplets				Diameter	Diameter	Diameter	Diameter
	1	2	1	2	1			1	0.838386	1.90478	0.794724	1.03152
	2	2	1	6	3			2	0.776605	1.54482	0.789347	0.820582
	3	3	1	2	5			3	0.74775	1.52643	0.76276	0.780196
	4	3	7	3	3			4	0.574245	1.50754	0.754315	0.769692
	5	3	1	4	2			5	0.713869	1.42611	0.714916	0.761275
	6	4	1	4	5			6	0.705134	1.32447	0.70717	0.739666
	7	3	1	7	4			7	0.698791	1.3162	0.690223	0.733629
	8	2	2	3	6			8	0.692621	1.2606	0.68174	0.726288
	9	3	1	7	2			9	0.685314	1.24864	0.658286	0.723664
	10	1	1	3	6			10	0.684886	1.24107	0.650163	0.687177
	11	4	1	6	3			11	0.661649	1.1899	0.649798	0.682036
	12	2	2	3	6			12	0.647763	1.17485	0.642545	0.675065
	13	2	1	2	3			13	0.64659	1.16501	0.637816	0.666915
	14	5	2	8	4			14	0.641331	1.13601	0.633664	0.664802
	15	4	1	6	3			15	0.632951	1.12133	0.631472	0.656477
	16	2	1	3	5			16	0.632014	1.1174	0.624873	0.653779
	17	4	1	4	4			17	0.622079	1.10983	0.617287	0.648443
	18	3	1	2	4			18	0.621463	1.09903	0.615754	0.645311
	19	5	0	7	4			19	0.618771	1.08139	0.610999	0.643388
	20	3	0	9	3			20	0.607941	1.07462	0.609483	0.643077
	21	3	0	7	6			21	0.606811	1.05199	0.60902	0.639387
	22	3	0	3	5			22	0.60536	1.03692	0.605875	0.629484
	23	4	2	4	3			23	0.604955	1.02567	0.605875	0.627884
	24	2	2	2	7			24	0.6028	1.02185	0.603015	0.624873
	25	3	0	6	7			25	0.600829	1.003	0.601577	0.622379
	26	4	1	5	6			26	0.598326	0.997916	0.594684	0.618589
	27	2	0	3	3			27	0.592968	0.9891	0.594581	0.61059
	28	1	1	4	5			28	0.592456	0.986675	0.594353	0.602819
	29	3	0	3	2			29	0.590116	0.98576	0.592277	0.601711
	30	1	3	4	1			30	0.586376	0.982916	0.583466	0.601577
	31	1	1	9	3			31	0.58316	0.979327	0.577001	0.598358
	32	1	0	6	3			32	0.582454	0.979265	0.577001	0.594353
	33	2	1	7	4			33	0.576738	0.969589	0.574346	0.594353
	34	2	1	6	6			34	0.575956	0.95848	0.573645	0.586689
	35	3	0	3	2			35	0.575888	0.955222	0.568405	0.584972
	36	3	2	3	7			36	0.574295	0.947813	0.565736	0.580659
	37	1	1	2	4			37	0.574295	0.947233	0.565167	0.578533
	38	5	2	3	3			38	0.564107	0.945054	0.561059	0.574797
	39	1	1	3	1			39	0.563582	0.935565	0.560736	0.571713
	40	7	0	3	1			40	0.563108	0.931216	0.560736	0.568405
	41	2	1	6	3			41	0.563017	0.927426	0.557282	0.562167
	42	3	1	6	3			42	0.561774	0.922059	0.553702	0.561059
	43	9	1	5	3			43	0.561547	0.919401	0.552178	0.556415
	44	6	1	3	2			44	0.557457	0.918895	0.550427	0.554976
	45	4	1	6	2			45	0.556932	0.914861	0.538186	0.54607
	46	2	2	4	7			46	0.555646	0.909424	0.535188	0.542375
	47	11	1	7	4			47	0.555138	0.904465	0.525172	0.542375
	48	2	1	8	2			48	0.552911	0.903992	0.521579	0.539679
	49	1	1	4	1			49	0.548602	0.896821	0.521482	0.539679
	50	2	2	4	3			50	0.546301	0.896797	0.520247	0.533023
	51	2	2	14	6			51	0.543384	0.894324	0.51845	0.531698
	52	3	2	8	7			52	0.533933	0.885073	0.518232	0.5299
	53	3	1	13	4			53	0.533619	0.872628	0.517708	0.527808
	54	3	1	4	2			54	0.533248	0.872316	0.517611	0.527093
	55	2	0	9	3			55	0.529094	0.847744	0.516366	0.523504
	56	1	0	7	6			56	0.528952	0.846062	0.51356	0.522114
	57	1	0	5	4			57	0.528499	0.842783	0.51324	0.521482
	58	3	1	5	11			58	0.525027	0.837416	0.51324	0.521068
	59	2	1	5	5			59	0.522005	0.831987	0.51324	0.520131
	60	1	1	4	5			60	0.521444	0.831464	0.511985	0.517455
	61	1	1	3	4			61	0.520488	0.827521	0.511724	0.515118
	62	3	1	5	4			62	0.510803	0.821896	0.508133	0.511509
	63	3	1	4	3			63	0.506218	0.802938	0.505699	0.511356
	64	1	1	3	3			64	0.505147	0.802584	0.505182	0.510618
	65	2	0	8	6			65	0.505147	0.801938	0.505182	0.507655
	66	1	0	5	2			66	0.503869	0.800307	0.503926	0.507655
	67	2	1	7	4			67	0.499567	0.785576	0.499899	0.503677
	68	3	1	6	4			68	0.49717	0.784309	0.497317	0.502288
	69	4	0	1	1			69	0.496838	0.781246	0.496183	0.493847
	70	3	0	5	15			70	0.495017	0.765085	0.495599	0.493419
	71	1	1	3	4			71	0.494213	0.75538	0.495372	0.493337
	72	1	1	3	3			72	0.493978	0.753495	0.494071	0.48949
	73	3	1	4	2			73	0.492177	0.692609	0.494071	0.480615
	74	2	1	1	4			74	0.488915	0.676088	0.491784	0.479379
	75	3	1	2	4			75	0.488057	0.662472	0.48949	0.478182
	76	2	1	2	5			76	0.486375	0.642081	0.485529	0.477343
	77	3	1	3	6			77	0.485695	0.633818	0.481368	0.475694
	78	1	1	4	5			78	0.485233	0.624022	0.475482	0.473044
	79	1	1	3	8			79	0.485205	0.621374	0.475482	0.471447
	80	2	1	6	5			80	0.484893	0.613722	0.471447	0.470913
	81	2	1	2	10			81	0.481409	0.604246	0.470892	0.467806
	82	2	1	3	4			82	0.481409	0.58813	0.469523	0.466528
	83	5	3	5	3			83	0.480413	0.568573	0.468236	0.466428
	84	2	4	6	5			84	0.479141	0.55533	0.461747	0.466428
	85	2	0	5	4			85	0.477582	0.527764	0.459476	0.459837
	86	2	0	6	3			86	0.477405	0.519218	0.456445	0.457546
	87	3	0	3	1			87	0.456876	0.511321	0.454193	0.454337
	88	6	1	2	2			88	0.456772	0.502997	0.450122	0.451112
	89	7	1	4	2			89	0.452362	0.490735	0.449921	0.448489
	90	2	4	6	5			90	0.451285	0.484072	0.448847	0.441801
	91	3	1	3	3			91	0.446491	0.483037	0.445039	0.440855
	92	5	1	5	2			92	0.444517	0.481029	0.442366	0.440356
	93	3	2	7	5			93	0.442805	0.465812	0.438254	0.432868
	94	3	3	4	3			94	0.436531	0.460542	0.435155	0.431296
	95	4	1	4	3			95	0.410475	0.450101	0.426654	0.430923
	96	1	1	4	4			96	0.408938	0.442206	0.426654	0.422247
	97	2	1	4	4			97	0.397736	0.436441	0.426229	0.418623
	98	2	1	3	5			98	0.394628	0.409804	0.423799	0.41855
	99	5	1	3	5			99	0.39458	0.402215	0.423434	0.401336
	100	5	0	6	5			100	0.390445	0.393828	0.422911	0.396412

## Sheet:  Figure 2F
Figure 2F
pFld1-ΔLR-mCherry							pFld1-mCherry
cells	LDs	LDs on Fld	% colocalisation				cells	LDs	LDs on NC	% colocalisation
25	111	85	76.5766				25	98	77	78.5714
25	95	79	83.1579				25	120	98	81.6667

## Sheet: Figure 2H
Figure 2
Figure 2H	Quantification of diameter EM images
fld1 delta										WT									fld1Δ+pFld1									fld1Δ+ pFld1-ΔLR
LD size (nm)	cells		sorted		LDs diameter 0-100 nm	%	LDs diameter 100-250nm	%		LD size (nm)	cells	sorted							LD size (nm)	cells	sorted							LD size (nm)	cells	sorted
87	1		59.4		7	12.963	32	59.2593		822	1	107	LDs diameter 0-100 nm	%	LDs diameter 100-250nm	%			390	1	241							280	1	111
92.5			68.6							293	2	111	0	0	13	48.1481			430		243	LDs diameter 0-100 nm	%	LDs diameter 100-250nm	%			214		160
118			87							210	3	142							339	2	244	0	0	3	6.25			335		160		LDs diameter 0-100 nm	%	LDs diameter 100-250nm	%
142	2		89.7		LDs diameter 250-500nm		LDs diameter 900nm			843	4	162							533		254							316	2	202		0	0	9	20.9302
155			90		11	20.3704	4	7.40741		815	5	168	LDs diameter 250-500nm		LDs diameter 900nm				420		260							431	3	209
101			92.5							618		184	14	51.8519	0	0			375		260	LDs diameter 250-500nm		LDs diameter 900nm				510	4	209
497	3		96.1							433	6	202							366	3	261	45	93.75	0	0			543	5	214		LDs diameter 250-500nm		LDs diameter 900nm
569	4		101							254	7	205							384		266							452		225		34	79.0698	0	0
260	5		103							512		209							596	4	268							338		244
202			107							255	8	210							243	5	277							451		253
207			118							184		233							241		279							316		265
312			119							168		244							460		288							278		266
215			124							335		250							349	6	288							271		271
158	6		125							390	9	254							268	7	293							302	6	271
205			128							233		255							260		298							348		278
158			141							142		255							365		307							396		280
235			142							513	10	275							277	8	313							266		300
233			153							335	11	293							492	9	321							244		302
205			153							202		301							288	10	322							334		316
216			155							111		312							266	11	334							509	7	316
327	7		158							350	12	335							321		334							515		330
231			158							416	13	335							338	12	338							160		334
107			168							250	14	350							313		339							209		335
90			170							275		352							244	13	348							202		338
141			192							209		390							307		349							378	8	339
220			202							205	15	416							394		353							339	9	348
192			203							312		433							348	14	355							405	10	348
103			204							244	16	512							355		365							300		351
124			205							162		513							288	15	366							570	11	351
711	8		205							301	17	618							389		373							412	12	378
570	9		207							107		815							429	16	373							209	13	389
168			215							352	18	822							254		375							111		396
1005	10		216							255	19	843							293	17	384							160		405
896	11		220																334		389							348		412
1240	12		231																489	18	390							265		420
570	13		233																392	19	392							540	14	429
647			235																353		394							576		431
453			237																605	20	398							513		451
543	14		248																334	21	420							477		452
119			260																373	22	426							429	15	468
203			266																373		429							351		477
204			272																472	23	429							546	16	479
237			276																279	24	430							351	17	491
272			289																298		438							330	18	509
669	15		299																426	25	460							225	19	510
599	16		300																429	26	472							389		513
266			312																261	27	489							479	20	515
289			327																398		492							468		536
96.1			453																322	28	533							253	21	540
68.6			497																438		596							271		543
59.4			501																260		605							491		546
89.7			543																									536		570
959	17		569																									420	22	576
125			570
170			570
891	18		599
276			647
248			669
299			711
501	19		891
153			896
128			959
300			1005
153			1010
1010	20		1240

## Sheet: Figure 3B and 3C
	Figure 3B						Figure 3C
	Number of droplets						Diameter of droplets
		WT	fld1Δ	fld1Δ +pfld1 promoter -full fld1	fld1Δ +pfld1 promoter -Fl1-ΔLR			WT	fld1Δ	fld1Δ +pfld1 promoter -full fld1	fld1Δ +pfld1 promoter -Fl1-ΔLR
	No. of Cells	Droplets	Droplets	Droplets	Droplets			Diameter	Diameter	diameter	diameter
	1	2	1	3	4		1	0.838386	1.90478	0.39	0.65
	2	2	1	2	4		2	0.776605	1.54482	0.35	0.58
	3	3	1	2	1		3	0.74775	1.52643	0.32	0.52
	4	3	7	5	5		4	0.574245	1.50754	0.39	0.52
	5	3	1	5	3		5	0.713869	1.42611	0.39	0.39
	6	4	1	4	3		6	0.705134	1.32447	0.39	0.58
	7	3	1	6	1		7	0.698791	1.3162	0.58	0.45
	8	2	2	5	1		8	0.692621	1.2606	0.78	0.52
	9	3	1	4	6		9	0.685314	1.24864	0.39	0.48
	10	1	1	4	7		10	0.684886	1.24107	0.52	0.48
	11	4	1	4	2		11	0.661649	1.1899	0.52	0.36
	12	2	2	3	2		12	0.647763	1.17485	0.39	0.52
	13	2	1	3	3		13	0.64659	1.16501	0.64	0.65
	14	5	2	7	2		14	0.641331	1.13601	0.52	0.78
	15	4	1	4	3		15	0.632951	1.12133	0.52	0.58
	16	2	1	4	4		16	0.632014	1.1174	0.45	0.58
	17	4	1	3	4		17	0.622079	1.10983	0.39	0.45
	18	3	1	7	5		18	0.621463	1.09903	0.45	0.45
	19	5	0	4	5		19	0.618771	1.08139	0.71	0.64
	20	3	0	4	4		20	0.607941	1.07462	0.5	0.54
	21	3	0	3	3		21	0.606811	1.05199	0.52	0.64
	22	3	0	8	4		22	0.60536	1.03692	0.45	0.58
	23	4	2	6	2		23	0.604955	1.02567	0.52	0.53
	24	2	2	5	4		24	0.6028	1.02185	0.65	0.52
	25	3	0	4	3		25	0.600829	1.003	0.84	0.52
	26	4	1	7	4		26	0.598326	0.997916	0.32	0.78
	27	2	0	3	1		27	0.592968	0.9891	0.32	0.91
	28	1	1	5	1		28	0.592456	0.986675	0.45	0.77
	29	3	0	6	4		29	0.590116	0.98576	0.45	0.71
	30	1	3	6	4		30	0.586376	0.982916	0.78	0.65
	31	1	1	6	4		31	0.58316	0.979327	0.9	0.58
	32	1	0	3	3		32	0.582454	0.979265	0.71	0.77
	33	2	1	4	2		33	0.576738	0.969589	0.58	0.71
	34	2	1	3	5		34	0.575956	0.95848	0.71	0.53
	35	3	0	3	5		35	0.575888	0.955222	0.64	0.84
	36	3	2	7	4		36	0.574295	0.947813	0.78	0.84
	37	1	1	4	4		37	0.574295	0.947233	0.52	0.71
	38	5	2	3	7		38	0.564107	0.945054	0.84	0.71
	39	1	1	3	3		39	0.563582	0.935565	0.5	0.58
	40	7	0	7	2		40	0.563108	0.931216	0.37	0.52
	41	2	1	5	3		41	0.563017	0.927426	0.32	0.5
	42	3	1	4	4		42	0.561774	0.922059	0.39	0.45
	43	9	1	5	5		43	0.561547	0.919401	0.32	0.45
	44	6	1	6	4		44	0.557457	0.918895	0.45	0.5
	45	4	1	3	3		45	0.556932	0.914861	0.45	0.58
	46	2	2	1	8		46	0.555646	0.909424	0.58	0.58
	47	11	1	4	3		47	0.555138	0.904465	0.62	0.58
	48	2	1	2	4		48	0.552911	0.903992	0.45	0.6
	49	1	1	3	3		49	0.548602	0.896821	0.34	0.52
	50	2	2	6	4		50	0.546301	0.896797	0.39	0.58
	51	2	2	5	3		51	0.543384	0.894324	0.39	0.45
	52	3	2	2	2		52	0.533933	0.885073	0.32	0.58
	53	3	1	3	1		53	0.533619	0.872628	0.5	0.64
	54	3	1	9	2		54	0.533248	0.872316	0.32	0.71
	55	2	0	8	3		55	0.529094	0.847744	0.39	0.58
	56	1	0	7	4		56	0.528952	0.846062	0.37	0.58
	57	1	0	7	4		57	0.528499	0.842783	0.37	0.77
	58	3	1	4	5		58	0.525027	0.837416	0.32	0.77
	59	2	1	2	3		59	0.522005	0.831987	0.37	0.64
	60	1	1	2	3		60	0.521444	0.831464	0.47	0.64
	61	1	1	1	3		61	0.520488	0.827521	0.46	0.58
	62	3	1	3	4		62	0.510803	0.821896	0.39	0.58
	63	3	1	2	4		63	0.506218	0.802938	0.45	0.52
	64	1	1	4	2		64	0.505147	0.802584	0.45	0.45
	65	2	0	3	4		65	0.505147	0.801938	0.58	0.58
	66	1	0	8	2		66	0.503869	0.800307	0.5	0.6
	67	2	1	5	3		67	0.499567	0.785576	0.5	0.62
	68	3	1	4	3		68	0.49717	0.784309	0.55	0.7
	69	4	0	3	7		69	0.496838	0.781246	0.58	0.65
	70	3	0	3	3		70	0.495017	0.765085	0.58	0.64
	71	1	1	2	9		71	0.494213	0.75538	0.5	0.39
	72	1	1	6	5		72	0.493978	0.753495	0.42	0.58
	73	3	1	3	3		73	0.492177	0.692609	0.6	0.58
	74	2	1	6	2		74	0.488915	0.676088	0.5	0.45
	75	3	1	8	6		75	0.488057	0.662472	0.45	0.52
	76	2	1	5	2		76	0.486375	0.642081	0.5	0.58
	77	3	1	1	4		77	0.485695	0.633818	0.5	0.45
	78	1	1	3	5		78	0.485233	0.624022	0.44	0.52
	79	1	1	3	4		79	0.485205	0.621374	0.39	0.58
	80	2	1	1	2		80	0.484893	0.613722	0.39	0.65
	81	2	1	7	3		81	0.481409	0.604246	0.58	0.58
	82	2	1	8	5		82	0.481409	0.58813	0.45	0.5
	83	5	3	3	6		83	0.480413	0.568573	0.32	0.64
	84	2	4	3	4		84	0.479141	0.55533	0.45	0.5
	85	2	0	5	6		85	0.477582	0.527764	0.45	0.84
	86	2	0	2	2		86	0.477405	0.519218	0.47	0.71
	87	3	0	2	2		87	0.456876	0.511321	0.5	0.58
	88	6	1	2	3		88	0.456772	0.502997	0.45	0.45
	89	7	1	3	5		89	0.452362	0.490735	0.39	0.45
	90	2	4	4	4		90	0.451285	0.484072	0.32	0.52
	91	3	1	3	4		91	0.446491	0.483037	0.32	0.71
	92	5	1	3	4		92	0.444517	0.481029	0.38	0.52
	93	3	2	4	4		93	0.442805	0.465812	0.5	0.71
	94	3	3	5	4		94	0.436531	0.460542	0.5	0.58
	95	4	1	7	4		95	0.410475	0.450101	0.52	0.52
	96	1	1	2	5		96	0.408938	0.442206	0.37	0.45
	97	2	1	2	3		97	0.397736	0.436441	0.52	0.58
	98	2	1	5	3		98	0.394628	0.409804	0.43	0.52
	99	5	1	5	3		99	0.39458	0.402215	0.45	0.45
	100	5	0	4	7		100	0.390445	0.393828	0.45	0.58

## Sheet: induction of droplets Fig 3G
Figure 3G
Time (h)	pFld1		pFld1-chimera
0	0	0	0	0
2	2.44	3.24	2.86	3.34
5	3.46	4.14	4.7	3.22
16	4.94	5.96	5.06	4.52

## Sheet: colocalisation with ERG6 Fig 3J
Figure 3J
3 delta GAL-LRO1 fld delta Erg6 GFP
2h							2h
pFld1-mCherry							pFld1-ΔLR- mCherry
cells	ERG6	ERG6 on Fld	% colocalisation				cells	ERG6	ERG6 on Fld	% colocalisation
50	343	293	85.4227				55	335	305	91.0448
51	305	276	90.4918				49	399	346	86.7168
5h							5h
pFld1 - mCherry							pFld1-ΔLR- mCherry
cells	ERG6	ERG6 on Fld	% colocalisation				cells	ERG6	ERG6 on Fld	% colocalisation
58	381	375	98.4252				55	287	283	98.6063
67	375	361	96.2667				50	270	264	97.7778

## Sheet: Figure 4 
	Figure 4 (pearsons cofficient)
	Fld1- mCherry								pFld1-ΔLR- mCherry
	4B	4D	4F	4H	4K	4N			4B	4D	4F	4H	4K	4N
	nem1 gfp	ldb16 gfp	pex30 gfp	slro1 gfp	dag sensor	yft2 gfp			nem1 gfp	ldb16 gfp	pex30 gfp	slro1 gfp	dag sensor	yft2 gfp
	0.703066	0.932055	0.794114	0.629197	0.821305	0.931647			0.692782	0.955988	0.834422	0.798101	0.732805	0.834601
	0.766196	0.922025	0.734613	0.802877	0.80909	0.942154			0.60487	0.911534	0.829048	0.674338	0.82124	0.837851
	0.696413	0.817464	0.799168	0.72242	0.846789	0.909511			0.778517	0.897746		0.731437	0.781862	0.871879
	0.706855	0.88195	0.78161	0.770486		0.891316				0.885686		0.766328	0.810428	0.911062
			0.899464	0.701331		0.87116				0.902082		0.849123	0.720158	0.881241
			0.812278			0.881224				0.896084		0.827608	0.841546	0.81636
			0.852901			0.838022				0.685925		0.824713	0.837548	0.867226
			0.743981			0.84784				0.891229		0.749555	0.803982	0.930198
						0.878187				0.943615			0.757604	0.963716
						0.821861				0.948811			0.837384	0.89448
						0.815343

## Sheet: Figure 5C and 5D
	Figure 5C								Figure 5D
	Number of droplets								Diameter of droplets
		WT	fld1Δ ldb16Δ	fld1Δ ldb16Δ + pFld1	fld1Δ ldb16Δ + pFld1-ΔLR	fld1Δ ldb16Δ + hSeipin			WT	fld1Δ ldb16Δ	fld1Δ ldb16Δ + pFld1	fld1Δ ldb16Δ + pFld1-ΔLR	fld1Δ ldb16Δ + hSeipin
	No. of Cells	Droplets	Droplets	Droplets	Droplets	Droplets			Diameter	Diameter	Diameter	Diameter	Diameter
	1	2	1	3	7	4		1	0.838386	1.38605	1.34155	0.907592	0.786709
	2	2	1	1	3	5		2	0.776605	1.3732	1.27752	0.904952	0.769255
	3	3	2	2	5	9		3	0.74775	1.33651	1.18445	0.836561	0.747033
	4	3	2	1	6	2		4	0.574245	1.32075	1.18241	0.804924	0.742781
	5	3	2	2	2	3		5	0.713869	1.31234	1.16969	0.804924	0.667169
	6	4	2	3	1	5		6	0.705134	1.27764	1.02917	0.780891	0.660265
	7	3	2	1	1	3		7	0.698791	1.27232	0.998508	0.724716	0.641146
	8	2	1	2	6	3		8	0.692621	1.26583	0.942706	0.721346	0.638166
	9	3	3	2	4	5		9	0.685314	1.2344	0.877953	0.71304	0.632907
	10	1	0	4	7	3		10	0.684886	1.20147	0.87558	0.712166	0.620526
	11	4	0	2	7	4		11	0.661649	1.17156	0.784965	0.681883	0.620469
	12	2	0	2	4	4		12	0.647763	1.14763	0.76745	0.681883	0.614764
	13	2	1	9	2	4		13	0.64659	1.12552	0.758499	0.675152	0.61396
	14	5	1	4	11	8		14	0.641331	1.10014	0.748865	0.656703	0.613408
	15	4	1	2	5	9		15	0.632951	1.08953	0.710971	0.654602	0.613041
	16	2	1	4	2	4		16	0.632014	1.07921	0.700022	0.636981	0.600358
	17	4	1	3	14	9		17	0.622079	1.04666	0.686599	0.620191	0.594023
	18	3	2	5	6	9		18	0.621463	1.03642	0.666226	0.617348	0.584801
	19	5	2	4	5	8		19	0.618771	0.995584	0.646322	0.605844	0.572463
	20	3	1	3	5	5		20	0.607941	0.967768	0.645365	0.600627	0.559662
	21	3	0	1	5	4		21	0.606811	0.913889	0.634843	0.598737	0.553411
	22	3	0	2	2	4		22	0.60536	0.896724	0.634199	0.597266	0.549501
	23	4	1	1	2	5		23	0.604955	0.886572	0.607118	0.588871	0.544652
	24	2	1	3	4	4		24	0.6028	0.876303	0.601247	0.585668	0.544652
	25	3	0	2	2	5		25	0.600829	0.87558	0.593281	0.573671	0.541931
	26	4	1	2	4	4		26	0.598326	0.853976	0.576589	0.562322	0.537338
	27	2	0	2	1	6		27	0.592968	0.835631	0.569472	0.560157	0.535889
	28	1	1	3	3	4		28	0.592456	0.82416	0.564107	0.549925	0.525635
	29	3	2	6	2	6		29	0.590116	0.800706	0.560179	0.547417	0.523141
	30	1	1	5	7	4		30	0.586376	0.786096	0.551949	0.54673	0.512751
	31	1	1	1	6	4		31	0.58316	0.779311	0.549362	0.545592	0.508185
	32	1	1	1	5	5		32	0.582454	0.764299	0.547452	0.54469	0.503101
	33	2	0	1	8	4		33	0.576738	0.717238	0.520881	0.535406	0.499855
	34	2	2	2	7	4		34	0.575956	0.701403	0.517057	0.533267	0.498299
	35	3	1	2	7	4		35	0.575888	0.696482	0.512472	0.531923	0.491383
	36	3	0	3	2	13		36	0.574295	0.687043	0.497792	0.530068	0.483815
	37	1	1	4	4	5		37	0.574295	0.680234	0.497568	0.509739	0.47978
	38	5	3	3	3	7		38	0.564107	0.677321	0.491973	0.505611	0.477549
	39	1	2	1	6	8		39	0.563582	0.667024	0.485387	0.500268	0.477284
	40	7	0	2	2	5		40	0.563108	0.663755	0.481507	0.489706	0.47092
	41	2	0	5	7	5		41	0.563017	0.59958	0.473022	0.486397	0.467911
	42	3	0	4	6	5		42	0.561774	0.57742	0.467049	0.483672	0.46329
	43	9	2	2	3	6		43	0.561547	0.561429	0.455014	0.470158	0.450894
	44	6	0	2	6	4		44	0.557457	0.525404	0.452432	0.456876	0.441183
	45	4	1	1	4	6		45	0.556932	0.503101	0.451687	0.450604	0.436859
	46	2	1	5	10	4		46	0.555646	0.49131	0.428252	0.449686	0.431079
	47	11	2	2	4	3		47	0.555138	0.471607	0.423325	0.443772	0.429555
	48	2	1	2	5	6		48	0.552911	0.446901	0.411533	0.43887	0.429355
	49	1	3	5	1	7		49	0.548602	0.445465	0.402186	0.43705	0.428375
	50	2	1	1	1	5		50	0.546301	0.44314	0.392482	0.421524	0.41549
	51	2	2	1	5	3		51	0.543384	0.441559	1.98113	0.420977	0.406564
	52	3	1	1	4	6		52	0.533933	0.434977	1.52456	0.41796	0.405593
	53	3	2	3	5	2		53	0.533619	0.420927	1.33004	0.411936	0.393578
	54	3	1	3	7	4		54	0.533248	0.419323	1.31449	0.411865	0.790045
	55	2	0	1	5	5		55	0.529094	0.396398	1.26235	1.1873	0.693056
	56	1	2	11	3	4		56	0.528952	1.59311	1.25954	0.81536	0.661627
	57	1	1	2	4	6		57	0.528499	1.5229	1.18885	0.752815	0.655964
	58	3	1	5	2	3		58	0.525027	1.36552	1.15641	0.717029	0.639553
	59	2	2	3	1	6		59	0.522005	1.36388	1.09816	0.659161	0.636505
	60	1	1	4	7	4		60	0.521444	1.33651	1.08565	0.60842	0.625142
	61	1	2	6	4	4		61	0.520488	1.30632	1.05758	0.604834	0.614731
	62	3	3	3	3	4		62	0.510803	1.27435	1.03717	0.597704	0.612008
	63	3	2	2	4	3		63	0.506218	1.26181	1.01735	0.55825	0.603721
	64	1	1	5	6	5		64	0.505147	1.24687	1.01123	0.552587	0.599092
	65	2	1	2	5	7		65	0.505147	1.13789	1.00502	0.549925	0.590726
	66	1	1	2	3	4		66	0.503869	1.134	0.977086	0.542669	0.582827
	67	2	1	5	5	4		67	0.499567	1.12937	0.938646	0.524308	0.582695
	68	3	2	4	3	5		68	0.49717	1.12036	0.869798	0.517656	0.577248
	69	4	1	3	5	6		69	0.496838	1.09378	0.841159	0.501408	0.573397
	70	3	3	2	3	4		70	0.495017	0.994826	0.741111	0.500438	0.56681
	71	1	2	3	3	5		71	0.494213	0.97324	0.71746	0.497568	0.565595
	72	1	2	2	4	4		72	0.493978	0.951468	0.698568	0.439424	0.55269
	73	3	0	2	7	6		73	0.492177	0.946584	0.660376	0.437391	0.550315
	74	2	0	1	8	7		74	0.488915	0.930245	0.658164	0.415249	0.547761
	75	3	0	4	3	4		75	0.488057	0.916737	0.639948	0.414575	0.546693
	76	2	1	2	5	5		76	0.486375	0.904838	0.638958	0.407481	0.542527
	77	3	1	2	3	10		77	0.485695	0.900414	0.63377	0.909069	0.540921
	78	1	3	1	9	5		78	0.485233	0.889366	0.59958	0.715562	0.535783
	79	1	0	3	6	6		79	0.485205	0.866713	0.597639	0.662041	0.529302
	80	2	3	11	5	4		80	0.484893	0.861629	0.591224	0.649881	0.525694
	81	2	2	2	5	5		81	0.481409	0.815602	0.586297	0.648231	0.522672
	82	2	2	3	4	3		82	0.481409	0.806107	0.530085	0.643969	0.519438
	83	5	2	1	3	5		83	0.480413	0.782402	0.49965	0.621712	0.518513
	84	2	1	2	3	7		84	0.479141	0.7386	0.491291	0.602808	0.507637
	85	2	0	2	8	4		85	0.477582	0.723683	0.490104	0.596569	0.505817
	86	2	0	3	7	3		86	0.477405	0.721275	0.482665	0.594	0.499567
	87	3	2	1	4	6		87	0.456876	0.717605	0.47978	0.576448	0.498384
	88	6	0	3	8	3		88	0.456772	0.678648	0.479273	0.563468	0.496153
	89	7	0	3	6	4		89	0.452362	0.671221	0.46329	0.553963	0.491394
	90	2	1	3	2	5		90	0.451285	0.652536	0.458037	0.547958	0.490251
	91	3	1	3	4	5		91	0.446491	0.646322	0.456342	0.545762	0.489441
	92	5	1	6	4	3		92	0.444517	0.583915	0.451963	0.537956	0.489201
	93	3	1	1	5	6		93	0.442805	0.564367	0.442329	0.528952	0.487816
	94	3	1	1	3	4		94	0.436531	0.525975	0.435722	0.499937	0.483804
	95	4	1	2	3	3		95	0.410475	0.514402	0.434418	0.497792	0.481139
	96	1	1	6	5	4		96	0.408938	0.501867	0.422725	0.49403	0.479566
	97	2	2	2	6	4		97	0.397736	0.478938	0.420323	0.482658	0.471278
	98	2	1	2	7	5		98	0.394628	0.464262	0.41796	0.478123	0.471278
	99	5	0	2	7	10		99	0.39458	0.456342	0.409946	0.4752	0.455492
	100	5	0	4	5	1		100	0.390445	0.444759	0.405613	0.474409	0.44753

## Sheet: Figure 6D graph RAW
Chrom.1		Chrom.1		Chrom.1		Chrom.1		Chrom.1
UV 1_280		Injection		Run Log		UV 1_280_CUT_TEMP@100,BASEM		Fraction
ml	mAU	ml	Injection	ml	Logbook	ml	mAU	ml	Fraction
-35.3564	0.104345	-0.001537		-35.3564	Method Settings	0	-0.0535	0.504211	3.A.1
-35.3525	1.44754			-35.3564	Buffer Equilibration	0.003998	-0.053495	1.00428	3.A.2
-35.3484	1.54509			-0.004475	Sample Application	0.007999	-0.05349	1.5039	3.A.3
-35.3445	1.54849			0.498173	Elution	0.011997	-0.053484	2.00433	3.A.4
-35.3405	0.876222			35.8455	mQ Wash	0.015995	-0.053479	2.50423	3.A.5
-35.3365	0.00174					0.019997	-0.053474	3.00435	3.A.6
-35.3325	0.006227					0.023994	-0.053469	3.50428	3.A.7
-35.3285	0.01471					0.027992	-0.053464	4.00417	3.A.8
-35.3245	0.024107					0.03199	-0.053458	4.5043	3.A.9
-35.3205	0.030999					0.035992	-0.053453	5.00422	3.A.10
-35.3165	0.038641					0.039989	-0.053448	5.50412	3.A.11
-35.3125	0.048594					0.043987	-0.053443	6.00425	3.A.12
-35.3085	0.056424					0.047989	-0.053437	6.50418	3.B.1
-35.3045	0.05802					0.051987	-0.053432	7.00457	3.B.2
-35.3005	0.056433					0.055984	-0.053427	7.5042	3.B.3
-35.2965	0.057455					0.059986	-0.053422	8.00463	3.B.4
-35.2925	0.055952					0.063984	-0.053416	8.50421	3.B.5
-35.2885	0.045279					0.067982	-0.053411	9.00465	3.B.6
-35.2845	0.079458					0.071983	-0.053406	9.50458	3.B.7
-35.2805	0.224949					0.075981	-0.053401	10.0047	3.B.8
-35.2765	0.415945					0.079979	-0.053396	10.5046	3.B.9
-35.2725	0.572986					0.083977	-0.05339	11.0045	3.B.10
-35.2685	0.660174					0.087978	-0.053385	11.5046	3.B.11
-35.2645	0.713915					0.091976	-0.05338	12.0045	3.B.12
-35.2605	0.717201					0.095974	-0.053374	12.5045	3.C.1
-35.2565	0.606795					0.099976	-0.053369	13.0046	3.C.2
-35.2525	0.416897					0.103973	-0.053364	13.5045	3.C.3
-35.2485	0.236535					0.107971	-0.053358	14.0049	3.C.4
-35.2445	0.111555					0.111973	-0.053353	14.5045	3.C.5
-35.2405	0.032634					0.115971	-0.053348	15.0049	3.C.6
-35.2365	-0.021334					0.119968	-0.053342	15.5049	3.C.7
-35.2325	-0.060548					0.12397	-0.053337	16.005	3.C.8
-35.2285	-0.093514					0.127968	-0.053332	16.5049	3.C.9
-35.2245	-0.124419					0.131966	-0.053327	17.005	3.C.10
-35.2205	-0.154739					0.135963	-0.053322	17.5049	3.C.11
-35.2165	-0.187732					0.139965	-0.053317	18.0048	3.C.12
-35.2125	-0.221063					0.143963	-0.053312	18.505	3.D.1
-35.2085	-0.251476					0.147961	-0.053307	19.0049	3.D.2
-35.2045	-0.28312					0.151962	-0.053302	19.5053	3.D.3
-35.2005	-0.312524					0.15596	-0.053297	20.0049	3.D.4
-35.1965	-0.336507					0.159958	-0.053292	20.5053	3.D.5
-35.1925	-0.3518					0.16396	-0.053286	21.0052	3.D.6
-35.1885	-0.365314					0.167957	-0.053281	21.5054	3.D.7
-35.1845	-0.382125					0.171955	-0.053275	22.0053	3.D.8
-35.1805	-0.39466					0.175953	-0.05327	22.5052	3.D.9
-35.1765	-0.406643					0.179955	-0.053264	23.0053	3.D.10
-35.1725	-0.415825					0.183952	-0.053259	23.5052	3.D.11
-35.1685	-0.424673					0.18795	-0.053253	24.0051	3.D.12
-35.1645	-0.431387					0.191952	-0.053248	24.5053	3.E.1
-35.1605	-0.432567					0.19595	-0.053242	25.0052	3.E.2
-35.1565	-0.431781					0.199947	-0.053237	25.5052	3.E.3
-35.1525	-0.427735					0.203949	-0.053232	26.0052	3.E.4
-35.1485	-0.419903					0.207947	-0.053226	26.5056	3.E.5
-35.1445	-0.410948					0.211945	-0.053221	27.0052	3.E.6
-35.1405	-0.40375					0.215946	-0.053216	27.5057	3.E.7
-35.1365	-0.397591					0.219944	-0.053211	28.0056	3.E.8
-35.1325	-0.392718					0.223942	-0.053205	28.5057	3.E.9
-35.1285	-0.386554					0.22794	-0.0532	29.0056	3.E.10
-35.1245	-0.381209					0.231941	-0.053195	29.5055	3.E.11
-35.1205	-0.381352					0.235939	-0.05319	30.0056	3.E.12
-35.1165	-0.382474					0.239937	-0.053184	30.5056	3.F.1
-35.1125	-0.387031					0.243938	-0.05318	31.006	3.F.2
-35.1085	-0.39602					0.247936	-0.053175	31.5056	3.F.3
-35.1045	-0.409544					0.251934	-0.05317	32.006	3.F.4
-35.1005	-0.428344					0.255936	-0.053165	32.5059	3.F.5
-35.0965	-0.447275					0.259933	-0.05316	33.006	3.F.6
-35.0925	-0.464804					0.263931	-0.053155	33.506	3.F.7
-35.0885	-0.484252					0.267933	-0.053151	34.0059	3.F.8
-35.0845	-0.502855					0.271931	-0.053146	34.506	3.F.9
-35.0805	-0.521705					0.275928	-0.053141	35.0059	3.F.10
-35.0765	-0.540731					0.279926	-0.053136	35.506	3.F.11
-35.0725	-0.557383					0.283928	-0.053131	35.845	Waste(Frac)
-35.0685	-0.57062					0.287926	-0.053125	36.4437	Waste
-35.0645	-0.583586					0.291924	-0.05312
-35.0605	-0.596428					0.295925	-0.053114
-35.0565	-0.603954					0.299923	-0.053109
-35.0525	-0.607804					0.303921	-0.053103
-35.0485	-0.611871					0.307922	-0.053098
-35.0445	-0.617943					0.31192	-0.053092
-35.0405	-0.622755					0.315918	-0.053087
-35.0365	-0.626785					0.31992	-0.053081
-35.0325	-0.631199					0.323917	-0.053076
-35.0285	-0.635165					0.327915	-0.053071
-35.0245	-0.639928					0.331913	-0.053066
-35.0205	-0.647354					0.335915	-0.053061
-35.0165	-0.652317					0.339912	-0.053056
-35.0125	-0.652353					0.34391	-0.053051
-35.0085	-0.650866					0.347912	-0.053046
-35.0045	-0.649978					0.35191	-0.053041
-35.0005	-0.648745					0.355907	-0.053036
-34.9965	-0.645872					0.359909	-0.053031
-34.9925	-0.645299					0.363907	-0.053026
-34.9885	-0.649263					0.367905	-0.05302
-34.9845	-0.653216					0.371906	-0.053015
-34.9805	-0.65855					0.375904	-0.053009
-34.9765	-0.664843					0.379902	-0.053004
-34.9725	-0.666619					0.3839	-0.052998
-34.9685	-0.665777					0.387901	-0.052993
-34.9646	-0.665924					0.391899	-0.052987
-34.9606	-0.668723					0.395897	-0.052982
-34.9566	-0.675228					0.399899	-0.052976
-34.9526	-0.6795					0.403896	-0.052971
-34.9486	-0.676317					0.407894	-0.052965
-34.9446	-0.668925					0.411896	-0.05296
-34.9406	-0.649558					0.415894	-0.052955
-34.9366	-0.611823					0.419891	-0.052949
-34.9326	-0.538177					0.423889	-0.052944
-34.9286	-0.40013					0.427891	-0.052938
-34.9246	-0.177045					0.431889	-0.052933
-34.9206	0.12164					0.435886	-0.052927
-34.9166	0.48146					0.439888	-0.052922
-34.9126	0.872449					0.443886	-0.052916
-34.9086	1.25445					0.447884	-0.052911
-34.9046	1.59841					0.451885	-0.052906
-34.9006	1.84919					0.455883	-0.0529
-34.8966	1.99404					0.459881	-0.052895
-34.8926	2.04721					0.463882	-0.05289
-34.8886	2.02492					0.46788	-0.052884
-34.8846	1.9535					0.471878	-0.052879
-34.8806	1.85968					0.475876	-0.052874
-34.8766	1.75467					0.479877	-0.052868
-34.8726	1.64002					0.483875	-0.052863
-34.8686	1.52585					0.487873	-0.052858
-34.8646	1.40837					0.491875	-0.052853
-34.8606	1.29474					0.495872	-0.052847
-34.8566	1.18822					0.49987	-0.052842
-34.8526	1.08427					0.503872	-0.052837
-34.8486	0.98336					0.50787	-0.052832
-34.8446	0.885569					0.511868	-0.052827
-34.8406	0.796671					0.515869	-0.052821
-34.8366	0.71345					0.519867	-0.052816
-34.8326	0.635128					0.523865	-0.052811
-34.8286	0.571867					0.527863	-0.052806
-34.8246	0.510515					0.531864	-0.052801
-34.8206	0.451148					0.535862	-0.052796
-34.8166	0.395683					0.53986	-0.052791
-34.8126	0.34276					0.543861	-0.052786
-34.8086	0.294284					0.547859	-0.052781
-34.8046	0.243747					0.551857	-0.052776
-34.8006	0.192259					0.555859	-0.052771
-34.7966	0.152811					0.559856	-0.052766
-34.7926	0.117773					0.563854	-0.052761
-34.7886	0.087177					0.567856	-0.052756
-34.7846	0.059939					0.571854	-0.052751
-34.7806	0.029793					0.575851	-0.052746
-34.7766	0.003572					0.579849	-0.052741
-34.7726	-0.017602					0.583851	-0.052736
-34.7686	-0.036416					0.587849	-0.052731
-34.7646	-0.056811					0.591846	-0.052727
-34.7606	-0.077854					0.595848	-0.052722
-34.7566	-0.095369					0.599846	-0.052717
-34.7526	-0.109687					0.603844	-0.052711
-34.7486	-0.123118					0.607845	-0.052705
-34.7446	-0.138546					0.611843	-0.0527
-34.7406	-0.153652					0.615841	-0.052694
-34.7366	-0.170814					0.619843	-0.052689
-34.7326	-0.183446					0.62384	-0.052683
-34.7286	-0.192368					0.627838	-0.052677
-34.7246	-0.201828					0.631836	-0.052672
-34.7206	-0.213965					0.635838	-0.052666
-34.7166	-0.227818					0.639835	-0.05266
-34.7126	-0.236121					0.643833	-0.052655
-34.7086	-0.247185					0.647835	-0.05265
-34.7046	-0.263047					0.651833	-0.052644
-34.7006	-0.278366					0.65583	-0.052639
-34.6966	-0.289709					0.659832	-0.052634
-34.6926	-0.30005					0.66383	-0.052628
-34.6886	-0.313739					0.667828	-0.052623
-34.6846	-0.329653					0.671825	-0.052618
-34.6806	-0.342085					0.675827	-0.052612
-34.6766	-0.352688					0.679825	-0.052607
-34.6726	-0.366584					0.683823	-0.052602
-34.6686	-0.375791					0.687824	-0.052597
-34.6646	-0.383426					0.691822	-0.052592
-34.6606	-0.39044					0.69582	-0.052587
-34.6566	-0.397044					0.699821	-0.052582
-34.6526	-0.406737					0.703819	-0.052577
-34.6486	-0.414475					0.707817	-0.052572
-34.6446	-0.422628					0.711819	-0.052567
-34.6406	-0.43168					0.715816	-0.052562
-34.6366	-0.439785					0.719814	-0.052557
-34.6326	-0.448514					0.723812	-0.052552
-34.6286	-0.457055					0.727814	-0.052547
-34.6246	-0.468027					0.731812	-0.052542
-34.6206	-0.47762					0.735809	-0.052538
-34.6166	-0.485406					0.739811	-0.052533
-34.6126	-0.493092					0.743809	-0.052528
-34.6086	-0.499267					0.747807	-0.052524
-34.6046	-0.50562					0.751808	-0.052519
-34.6006	-0.51044					0.755806	-0.052514
-34.5966	-0.518515					0.759804	-0.052509
-34.5926	-0.528087					0.763805	-0.052504
-34.5886	-0.536337					0.767803	-0.052498
-34.5846	-0.542372					0.771801	-0.052492
-34.5806	-0.546597					0.775799	-0.052486
-34.5766	-0.549279					0.7798	-0.05248
-34.5727	-0.55131					0.783798	-0.052474
-34.5687	-0.552321					0.787796	-0.052468
-34.5647	-0.553268					0.791798	-0.052462
-34.5607	-0.558661					0.795795	-0.052456
-34.5567	-0.564064					0.799793	-0.05245
-34.5527	-0.568355					0.803795	-0.052445
-34.5487	-0.572016					0.807793	-0.05244
-34.5447	-0.576901					0.81179	-0.052434
-34.5407	-0.5804					0.815792	-0.052429
-34.5367	-0.580205					0.81979	-0.052423
-34.5327	-0.581713					0.823788	-0.052418
-34.5287	-0.58439					0.827785	-0.052413
-34.5247	-0.585635					0.831787	-0.052407
-34.5207	-0.583808					0.835785	-0.052402
-34.5167	-0.58222					0.839783	-0.052397
-34.5127	-0.582704					0.843784	-0.052392
-34.5087	-0.582831					0.847782	-0.052387
-34.5047	-0.583536					0.85178	-0.052382
-34.5007	-0.587465					0.855782	-0.052377
-34.4967	-0.593176					0.859779	-0.052373
-34.4927	-0.598815					0.863777	-0.052368
-34.4887	-0.602202					0.867779	-0.052363
-34.4847	-0.605897					0.871777	-0.052358
-34.4807	-0.610931					0.875774	-0.052353
-34.4767	-0.614489					0.879772	-0.052348
-34.4727	-0.61743					0.883774	-0.052343
-34.4687	-0.620023					0.887772	-0.052337
-34.4647	-0.621176					0.891769	-0.052332
-34.4607	-0.622056					0.895771	-0.052327
-34.4567	-0.622467					0.899769	-0.052321
-34.4527	-0.621633					0.903767	-0.052316
-34.4487	-0.619886					0.907768	-0.05231
-34.4447	-0.619378					0.911766	-0.052305
-34.4407	-0.625971					0.915764	-0.052299
-34.4367	-0.633664					0.919762	-0.052294
-34.4327	-0.637116					0.923763	-0.052288
-34.4287	-0.64158					0.927761	-0.052282
-34.4247	-0.645221					0.931759	-0.052277
-34.4207	-0.646342					0.93576	-0.052271
-34.4167	-0.645767					0.939758	-0.052265
-34.4127	-0.647421					0.943756	-0.05226
-34.4087	-0.647084					0.947758	-0.052254
-34.4047	-0.646238					0.951756	-0.052248
-34.4007	-0.646469					0.955753	-0.052243
-34.3967	-0.649725					0.959755	-0.052237
-34.3927	-0.653171					0.963753	-0.052232
-34.3887	-0.652678					0.967751	-0.052227
-34.3847	-0.652467					0.971748	-0.052223
-34.3807	-0.651246					0.97575	-0.052218
-34.3767	-0.649236					0.979748	-0.052213
-34.3727	-0.646866					0.983746	-0.052208
-34.3687	-0.64413					0.987747	-0.052204
-34.3647	-0.639613					0.991745	-0.052199
-34.3607	-0.629939					0.995743	-0.052194
-34.3567	-0.629666					0.999744	-0.052189
-34.3527	-0.635884					1.00374	-0.052184
-34.3487	-0.639279					1.00774	-0.052179
-34.3447	-0.637759					1.01174	-0.052173
-34.3407	-0.637954					1.01574	-0.052168
-34.3367	-0.647397					1.01974	-0.052163
-34.3327	-0.652006					1.02374	-0.052158
-34.3287	-0.650287					1.02774	-0.052152
-34.3247	-0.649051					1.03173	-0.052147
-34.3207	-0.651519					1.03573	-0.052142
-34.3167	-0.65476					1.03973	-0.052136
-34.3127	-0.654725					1.04373	-0.052132
-34.3087	-0.654938					1.04773	-0.052128
-34.3047	-0.653927					1.05173	-0.052124
-34.3007	-0.65412					1.05573	-0.05212
-34.2967	-0.653732					1.05973	-0.052116
-34.2927	-0.652377					1.06373	-0.052112
-34.2887	-0.651188					1.06773	-0.052108
-34.2847	-0.647507					1.07172	-0.052104
-34.2807	-0.646483					1.07572	-0.0521
-34.2767	-0.645105					1.07972	-0.052096
-34.2727	-0.64687					1.08372	-0.05209
-34.2687	-0.649447					1.08772	-0.052083
-34.2647	-0.651429					1.09172	-0.052077
-34.2607	-0.654418					1.09572	-0.052071
-34.2567	-0.65828					1.09972	-0.052065
-34.2527	-0.66225					1.10372	-0.052059
-34.2487	-0.661943					1.10772	-0.052052
-34.2447	-0.661032					1.11171	-0.052046
-34.2407	-0.662759					1.11572	-0.05204
-34.2367	-0.664844					1.11971	-0.052034
-34.2327	-0.667214					1.12371	-0.052029
-34.2287	-0.667484					1.12771	-0.052024
-34.2247	-0.668915					1.13171	-0.052019
-34.2207	-0.674325					1.13571	-0.052014
-34.2167	-0.6753					1.13971	-0.05201
-34.2127	-0.676815					1.14371	-0.052005
-34.2087	-0.67677					1.1477	-0.052
-34.2047	-0.676869					1.1517	-0.051995
-34.2007	-0.67887					1.1557	-0.051991
-34.1967	-0.677878					1.1597	-0.051986
-34.1927	-0.674921					1.1637	-0.05198
-34.1888	-0.672524					1.1677	-0.051975
-34.1848	-0.669931					1.1717	-0.05197
-34.1808	-0.667136					1.1757	-0.051965
-34.1768	-0.665349					1.17969	-0.05196
-34.1728	-0.663959					1.1837	-0.051954
-34.1688	-0.666081					1.18769	-0.051949
-34.1648	-0.669931					1.19169	-0.051944
-34.1608	-0.671655					1.19569	-0.051939
-34.1568	-0.673633					1.19969	-0.051933
-34.1528	-0.67202					1.20369	-0.051928
-34.1488	-0.669199					1.20769	-0.051922
-34.1448	-0.667926					1.21169	-0.051917
-34.1408	-0.667934					1.21569	-0.051911
-34.1368	-0.667162					1.21968	-0.051906
-34.1328	-0.668915					1.22369	-0.0519
-34.1288	-0.672247					1.22768	-0.051895
-34.1248	-0.67482					1.23168	-0.051889
-34.1208	-0.67698					1.23568	-0.051884
-34.1168	-0.676586					1.23968	-0.051879
-34.1128	-0.674161					1.24368	-0.051873
-34.1088	-0.670479					1.24768	-0.051867
-34.1048	-0.668809					1.25168	-0.051862
-34.1008	-0.671381					1.25568	-0.051856
-34.0968	-0.671613					1.25968	-0.051851
-34.0928	-0.67119					1.26368	-0.051845
-34.0888	-0.670463					1.26767	-0.05184
-34.0848	-0.671609					1.27167	-0.051834
-34.0808	-0.667586					1.27567	-0.051829
-34.0768	-0.665283					1.27967	-0.051823
-34.0728	-0.664858					1.28367	-0.051818
-34.0688	-0.663823					1.28767	-0.051812
-34.0648	-0.662358					1.29167	-0.051806
-34.0608	-0.662913					1.29567	-0.051801
-34.0568	-0.66666					1.29967	-0.051795
-34.0528	-0.667212					1.30367	-0.05179
-34.0488	-0.667173					1.30766	-0.051784
-34.0448	-0.668384					1.31167	-0.051778
-34.0408	-0.672273					1.31566	-0.051773
-34.0368	-0.678042					1.31966	-0.051767
-34.0328	-0.679309					1.32366	-0.051762
-34.0288	-0.680193					1.32766	-0.051756
-34.0248	-0.679873					1.33166	-0.05175
-34.0208	-0.679129					1.33566	-0.051745
-34.0168	-0.681782					1.33966	-0.051739
-34.0128	-0.678698					1.34366	-0.051733
-34.0088	-0.676646					1.34765	-0.051728
-34.0048	-0.679211					1.35165	-0.051722
-34.0008	-0.680033					1.35565	-0.051716
-33.9968	-0.678181					1.35965	-0.051711
-33.9928	-0.673823					1.36365	-0.051707
-33.9888	-0.671625					1.36765	-0.051703
-33.9848	-0.6713					1.37165	-0.051699
-33.9808	-0.670201					1.37565	-0.051696
-33.9768	-0.670056					1.37965	-0.051692
-33.9728	-0.672228					1.38364	-0.051688
-33.9688	-0.674412					1.38764	-0.051684
-33.9648	-0.674253					1.39164	-0.051681
-33.9608	-0.675384					1.39564	-0.051677
-33.9568	-0.674865					1.39964	-0.051673
-33.9528	-0.673002					1.40364	-0.051667
-33.9488	-0.671939					1.40764	-0.051662
-33.9448	-0.668423					1.41164	-0.051656
-33.9408	-0.668423					1.41564	-0.05165
-33.9368	-0.669183					1.41964	-0.051644
-33.9328	-0.667528					1.42363	-0.051639
-33.9288	-0.669439					1.42763	-0.051633
-33.9248	-0.670552					1.43163	-0.051627
-33.9208	-0.67095					1.43563	-0.051622
-33.9168	-0.67653					1.43963	-0.051616
-33.9128	-0.67676					1.44363	-0.05161
-33.9088	-0.677536					1.44763	-0.051604
-33.9048	-0.677773					1.45163	-0.051599
-33.9008	-0.679616					1.45563	-0.051593
-33.8968	-0.684001					1.45962	-0.051587
-33.8928	-0.683727					1.46362	-0.051581
-33.8888	-0.6863					1.46762	-0.051576
-33.8848	-0.689766					1.47162	-0.05157
-33.8808	-0.691457					1.47562	-0.051564
-33.8768	-0.689262					1.47962	-0.051558
-33.8728	-0.687864					1.48362	-0.051553
-33.8688	-0.689187					1.48762	-0.051547
-33.8648	-0.689161					1.49161	-0.051541
-33.8608	-0.6868					1.49562	-0.051535
-33.8568	-0.686598					1.49961	-0.051529
-33.8528	-0.688527					1.50361	-0.051524
-33.8488	-0.6913					1.50761	-0.051518
-33.8448	-0.691395					1.51161	-0.051512
-33.8408	-0.690422					1.51561	-0.051506
-33.8368	-0.691904					1.51961	-0.051501
-33.8328	-0.692823					1.52361	-0.051497
-33.8288	-0.693993					1.52761	-0.051493
-33.8248	-0.693274					1.53161	-0.051489
-33.8208	-0.691033					1.53561	-0.051485
-33.8168	-0.688979					1.5396	-0.051481
-33.8128	-0.689245					1.5436	-0.051477
-33.8088	-0.691895					1.5476	-0.051473
-33.8048	-0.691508					1.5516	-0.05147
-33.8008	-0.690961					1.5556	-0.051466
-33.7968	-0.690792					1.5596	-0.051462
-33.7929	-0.691085					1.5636	-0.051456
-33.7889	-0.689899					1.5676	-0.05145
-33.7849	-0.688805					1.57159	-0.051444
-33.7809	-0.693552					1.5756	-0.051438
-33.7769	-0.69867					1.57959	-0.051433
-33.7729	-0.703027					1.58359	-0.051427
-33.7689	-0.707922					1.58759	-0.051421
-33.7649	-0.71258					1.59159	-0.051415
-33.7609	-0.711702					1.59559	-0.051409
-33.7569	-0.70703					1.59959	-0.051403
-33.7529	-0.703758					1.60359	-0.051398
-33.7489	-0.703986					1.60759	-0.051392
-33.7449	-0.704686					1.61159	-0.051386
-33.7409	-0.704708					1.61559	-0.05138
-33.7369	-0.706034					1.61958	-0.051374
-33.7329	-0.708285					1.62358	-0.051368
-33.7289	-0.70903					1.62758	-0.051362
-33.7249	-0.706399					1.63158	-0.051357
-33.7209	-0.703872					1.63558	-0.051351
-33.7169	-0.703592					1.63958	-0.051345
-33.7129	-0.704911					1.64358	-0.051341
-33.7089	-0.703355					1.64758	-0.051337
-33.7049	-0.701063					1.65158	-0.051333
-33.7009	-0.700287					1.65558	-0.051329
-33.6969	-0.699581					1.65957	-0.051325
-33.6929	-0.697894					1.66357	-0.051321
-33.6889	-0.695681					1.66757	-0.051317
-33.6849	-0.695638					1.67157	-0.051314
-33.6809	-0.697982					1.67557	-0.05131
-33.6769	-0.69928					1.67957	-0.051306
-33.6729	-0.700766					1.68357	-0.0513
-33.6689	-0.704963					1.68756	-0.051294
-33.6649	-0.709139					1.69157	-0.051288
-33.6609	-0.710111					1.69556	-0.051282
-33.6569	-0.711224					1.69956	-0.051276
-33.6529	-0.71461					1.70356	-0.05127
-33.6489	-0.718716					1.70756	-0.051264
-33.6449	-0.718942					1.71156	-0.051258
-33.6409	-0.718536					1.71556	-0.051253
-33.6369	-0.719949					1.71956	-0.051247
-33.6329	-0.721925					1.72356	-0.051241
-33.6289	-0.720657					1.72755	-0.051235
-33.6249	-0.716713					1.73156	-0.051229
-33.6209	-0.715084					1.73555	-0.051223
-33.6169	-0.711604					1.73955	-0.051217
-33.6129	-0.707717					1.74355	-0.051211
-33.6089	-0.704119					1.74755	-0.051205
-33.6049	-0.701788					1.75155	-0.051199
-33.6009	-0.699366					1.75555	-0.051193
-33.5969	-0.698018					1.75955	-0.051188
-33.5929	-0.697158					1.76355	-0.051184
-33.5889	-0.699066					1.76754	-0.05118
-33.5849	-0.699504					1.77154	-0.051176
-33.5809	-0.699122					1.77554	-0.051172
-33.5769	-0.699606					1.77954	-0.051168
-33.5729	-0.700145					1.78354	-0.051164
-33.5689	-0.699393					1.78754	-0.05116
-33.5649	-0.697739					1.79154	-0.051156
-33.5609	-0.697324					1.79554	-0.051152
-33.5569	-0.697337					1.79954	-0.051148
-33.5529	-0.698584					1.80354	-0.051142
-33.5489	-0.698741					1.80754	-0.051136
-33.5449	-0.700886					1.81153	-0.05113
-33.5409	-0.700755					1.81553	-0.051124
-33.5369	-0.702758					1.81953	-0.051118
-33.5329	-0.70318					1.82353	-0.051112
-33.5289	-0.70199					1.82753	-0.051106
-33.5249	-0.697889					1.83153	-0.051101
-33.5209	-0.69461					1.83553	-0.051095
-33.5169	-0.694075					1.83953	-0.051089
-33.5129	-0.696797					1.84353	-0.051085
-33.5089	-0.698003					1.84753	-0.051081
-33.5049	-0.698029					1.85152	-0.051077
-33.5009	-0.701879					1.85552	-0.051073
-33.4969	-0.704917					1.85952	-0.051069
-33.4929	-0.70605					1.86352	-0.051065
-33.4889	-0.704735					1.86752	-0.051061
-33.4849	-0.704686					1.87152	-0.051057
-33.4809	-0.707632					1.87552	-0.051053
-33.4769	-0.707627					1.87952	-0.051049
-33.4729	-0.708494					1.88351	-0.051043
-33.4689	-0.710662					1.88752	-0.051037
-33.4649	-0.711732					1.89151	-0.051031
-33.4609	-0.712695					1.89551	-0.051025
-33.4569	-0.713669					1.89951	-0.051019
-33.4529	-0.71257					1.90351	-0.051013
-33.4489	-0.712687					1.90751	-0.051007
-33.4449	-0.713934					1.91151	-0.051001
-33.4409	-0.716592					1.91551	-0.050995
-33.4369	-0.718047					1.91951	-0.050989
-33.4329	-0.717836					1.9235	-0.050983
-33.4289	-0.719319					1.92751	-0.050977
-33.4249	-0.719701					1.9315	-0.050972
-33.4209	-0.717254					1.9355	-0.050966
-33.4169	-0.713803					1.9395	-0.05096
-33.4129	-0.710261					1.9435	-0.050954
-33.409	-0.708178					1.9475	-0.050948
-33.4049	-0.707534					1.9515	-0.050942
-33.401	-0.707781					1.9555	-0.050936
-33.397	-0.711784					1.9595	-0.05093
-33.393	-0.716297					1.9635	-0.050926
-33.389	-0.719763					1.96749	-0.050922
-33.385	-0.723958					1.97149	-0.050918
-33.381	-0.725092					1.97549	-0.050914
-33.377	-0.726095					1.97949	-0.05091
-33.373	-0.725795					1.98349	-0.050906
-33.369	-0.72394					1.98749	-0.050902
-33.365	-0.721634					1.99149	-0.050898
-33.361	-0.719946					1.99549	-0.050894
-33.357	-0.71869					1.99948	-0.05089
-33.353	-0.716712					2.00349	-0.050884
-33.349	-0.713919					2.00748	-0.050878
-33.345	-0.713093					2.01148	-0.050872
-33.341	-0.713903					2.01548	-0.050866
-33.337	-0.712304					2.01948	-0.05086
-33.333	-0.709886					2.02348	-0.050854
-33.329	-0.709319					2.02748	-0.050848
-33.325	-0.71039					2.03148	-0.050842
-33.321	-0.711955					2.03548	-0.050836
-33.317	-0.712592					2.03947	-0.05083
-33.313	-0.714147					2.04348	-0.050826
-33.309	-0.716765					2.04747	-0.050822
-33.305	-0.71959					2.05147	-0.050818
-33.301	-0.721991					2.05547	-0.050814
-33.297	-0.722835					2.05947	-0.05081
-33.293	-0.721338					2.06347	-0.050806
-33.289	-0.721488					2.06747	-0.050802
-33.285	-0.723488					2.07147	-0.050798
-33.281	-0.722705					2.07547	-0.050794
-33.277	-0.7235					2.07946	-0.050791
-33.273	-0.722622					2.08347	-0.050785
-33.269	-0.722254					2.08746	-0.050779
-33.265	-0.720515					2.09146	-0.050773
-33.261	-0.718915					2.09546	-0.050767
-33.257	-0.721572					2.09946	-0.050761
-33.253	-0.722027					2.10346	-0.050755
-33.249	-0.723994					2.10746	-0.050749
-33.245	-0.725942					2.11146	-0.050743
-33.241	-0.728488					2.11546	-0.050737
-33.237	-0.730778					2.11945	-0.050731
-33.233	-0.728505					2.12345	-0.050725
-33.229	-0.729916					2.12745	-0.050719
-33.225	-0.730173					2.13145	-0.050713
-33.221	-0.730521					2.13545	-0.050707
-33.217	-0.729467					2.13945	-0.050701
-33.213	-0.729037					2.14345	-0.050695
-33.209	-0.730922					2.14745	-0.050689
-33.205	-0.728627					2.15145	-0.050683
-33.201	-0.729947					2.15544	-0.050677
-33.197	-0.733518					2.15945	-0.050671
-33.193	-0.737916					2.16344	-0.050667
-33.189	-0.742709					2.16744	-0.050663
-33.185	-0.742917					2.17144	-0.050659
-33.181	-0.744014					2.17544	-0.050655
-33.177	-0.746089					2.17944	-0.050651
-33.173	-0.745762					2.18344	-0.050647
-33.169	-0.744054					2.18744	-0.050643
-33.165	-0.741795					2.19144	-0.050639
-33.161	-0.743702					2.19543	-0.050635
-33.157	-0.748572					2.19944	-0.050631
-33.153	-0.747828					2.20343	-0.050625
-33.149	-0.744972					2.20743	-0.050619
-33.145	-0.74414					2.21143	-0.050613
-33.141	-0.742802					2.21543	-0.050607
-33.137	-0.740136					2.21943	-0.050601
-33.133	-0.735616					2.22343	-0.050595
-33.129	-0.734223					2.22743	-0.05059
-33.125	-0.734675					2.23143	-0.050584
-33.121	-0.736533					2.23542	-0.050578
-33.117	-0.736382					2.23943	-0.050572
-33.113	-0.736885					2.24342	-0.050568
-33.109	-0.738912					2.24742	-0.050564
-33.105	-0.739806					2.25142	-0.05056
-33.101	-0.740379					2.25542	-0.050556
-33.097	-0.737978					2.25942	-0.050552
-33.093	-0.738004					2.26342	-0.050548
-33.089	-0.741417					2.26742	-0.050544
-33.085	-0.742816					2.27142	-0.05054
-33.081	-0.742556					2.27541	-0.050536
-33.077	-0.740142					2.27942	-0.050532
-33.073	-0.74228					2.28341	-0.050526
-33.069	-0.744651					2.28741	-0.05052
-33.065	-0.74112					2.29141	-0.050514
-33.061	-0.738103					2.29541	-0.050508
-33.057	-0.737287					2.29941	-0.050502
-33.053	-0.738568					2.30341	-0.050496
-33.049	-0.738576					2.30741	-0.05049
-33.045	-0.738625					2.31141	-0.050484
-33.041	-0.740202					2.3154	-0.050478
-33.037	-0.74267					2.31941	-0.050472
-33.033	-0.741466					2.3234	-0.050466
-33.029	-0.74093					2.3274	-0.050461
-33.025	-0.739992					2.3314	-0.050455
-33.021	-0.737842					2.3354	-0.050449
-33.0171	-0.736354					2.3394	-0.050443
-33.013	-0.735626					2.3434	-0.050437
-33.0091	-0.738742					2.3474	-0.050431
-33.0051	-0.742287					2.3514	-0.050425
-33.0011	-0.744806					2.3554	-0.050419
-32.9971	-0.747702					2.35939	-0.050413
-32.9931	-0.74712					2.36339	-0.050409
-32.9891	-0.745497					2.36739	-0.050405
-32.9851	-0.745158					2.37139	-0.050401
-32.9811	-0.744822					2.37539	-0.050397
-32.9771	-0.745667					2.37939	-0.050393
-32.9731	-0.746476					2.38339	-0.050389
-32.9691	-0.747137					2.38739	-0.050385
-32.9651	-0.752614					2.39138	-0.050381
-32.9611	-0.75718					2.39539	-0.050377
-32.9571	-0.758833					2.39938	-0.050373
-32.9531	-0.755333					2.40338	-0.050368
-32.9491	-0.754496					2.40738	-0.050362
-32.9451	-0.756745					2.41138	-0.050356
-32.9411	-0.757118					2.41538	-0.05035
-32.9371	-0.756906					2.41938	-0.050344
-32.9331	-0.755781					2.42338	-0.050338
-32.9291	-0.758344					2.42738	-0.050332
-32.9251	-0.760434					2.43137	-0.050326
-32.9211	-0.760309					2.43538	-0.05032
-32.9171	-0.761298					2.43937	-0.050314
-32.9131	-0.761445					2.44337	-0.05031
-32.9091	-0.761099					2.44737	-0.050306
-32.9051	-0.761032					2.45137	-0.050302
-32.9011	-0.761969					2.45537	-0.050299
-32.8971	-0.762565					2.45937	-0.050295
-32.8931	-0.762457					2.46337	-0.050291
-32.8891	-0.760336					2.46737	-0.050287
-32.8851	-0.760341					2.47136	-0.050283
-32.8811	-0.761134					2.47537	-0.050279
-32.8771	-0.758169					2.47936	-0.050275
-32.8731	-0.755259					2.48336	-0.050269
-32.8691	-0.754734					2.48736	-0.050263
-32.8651	-0.753836					2.49136	-0.050257
-32.8611	-0.751738					2.49536	-0.050251
-32.8571	-0.751796					2.49936	-0.050245
-32.8531	-0.753881					2.50336	-0.050239
-32.8491	-0.757047					2.50736	-0.050234
-32.8451	-0.757531					2.51135	-0.050228
-32.8411	-0.756467					2.51535	-0.050222
-32.8371	-0.758205					2.51935	-0.050216
-32.8331	-0.757275					2.52335	-0.05021
-32.8291	-0.757209					2.52735	-0.050204
-32.8251	-0.757626					2.53135	-0.050198
-32.8211	-0.758777					2.53535	-0.050192
-32.8171	-0.763088					2.53935	-0.050186
-32.8131	-0.765359					2.54335	-0.050181
-32.8091	-0.766323					2.54734	-0.050175
-32.8051	-0.7682					2.55135	-0.050169
-32.8011	-0.768821					2.55534	-0.050163
-32.7971	-0.770372					2.55934	-0.050157
-32.7931	-0.768529					2.56334	-0.050153
-32.7891	-0.767669					2.56734	-0.050149
-32.7851	-0.767649					2.57134	-0.050145
-32.7811	-0.768013					2.57534	-0.050141
-32.7771	-0.768254					2.57934	-0.050138
-32.7731	-0.767865					2.58334	-0.050134
-32.7691	-0.769254					2.58733	-0.05013
-32.7651	-0.772682					2.59133	-0.050126
-32.7611	-0.774378					2.59533	-0.050122
-32.7571	-0.775533					2.59933	-0.050118
-32.7531	-0.778769					2.60333	-0.050112
-32.7491	-0.780066					2.60733	-0.050106
-32.7451	-0.780035					2.61133	-0.0501
-32.7411	-0.779588					2.61533	-0.050095
-32.7371	-0.775616					2.61933	-0.050089
-32.7331	-0.773471					2.62332	-0.050083
-32.7291	-0.770476					2.62732	-0.050077
-32.7251	-0.768527					2.63132	-0.050071
-32.7211	-0.76756					2.63532	-0.050065
-32.7171	-0.767565					2.63932	-0.050059
-32.7131	-0.767748					2.64332	-0.050056
-32.7091	-0.770698					2.64732	-0.050052
-32.7051	-0.772553					2.65132	-0.050048
-32.7011	-0.774925					2.65532	-0.050044
-32.6971	-0.77688					2.65932	-0.05004
-32.6931	-0.775683					2.66331	-0.050036
-32.6891	-0.775622					2.66731	-0.050032
-32.6851	-0.776114					2.67131	-0.050028
-32.6811	-0.777414					2.67531	-0.050024
-32.6771	-0.778039					2.67931	-0.050021
-32.6731	-0.777348					2.68331	-0.050015
-32.6691	-0.776323					2.68731	-0.050009
-32.6651	-0.776272					2.69131	-0.050003
-32.6611	-0.774786					2.69531	-0.049997
-32.6571	-0.778233					2.69931	-0.049991
-32.6531	-0.780605					2.7033	-0.049986
-32.6491	-0.779274					2.70731	-0.04998
-32.6451	-0.779056					2.7113	-0.049974
-32.6411	-0.782025					2.7153	-0.049968
-32.6371	-0.78765					2.7193	-0.049962
-32.6331	-0.789679					2.7233	-0.049957
-32.6292	-0.788393					2.7273	-0.049951
-32.6252	-0.789736					2.7313	-0.049945
-32.6212	-0.79326					2.7353	-0.049939
-32.6172	-0.79572					2.7393	-0.049933
-32.6132	-0.792633					2.74329	-0.049928
-32.6092	-0.787607					2.74729	-0.049922
-32.6052	-0.782645					2.75129	-0.049916
-32.6012	-0.778631					2.75529	-0.04991
-32.5972	-0.77709					2.75929	-0.049904
-32.5932	-0.7764					2.76329	-0.0499
-32.5892	-0.774838					2.76729	-0.049897
-32.5852	-0.772907					2.77129	-0.049893
-32.5812	-0.774593					2.77529	-0.049889
-32.5772	-0.780738					2.77928	-0.049885
-32.5732	-0.787265					2.78328	-0.049881
-32.5692	-0.79187					2.78728	-0.049877
-32.5652	-0.795354					2.79128	-0.049874
-32.5612	-0.800631					2.79528	-0.04987
-32.5572	-0.805584					2.79928	-0.049866
-32.5532	-0.806068					2.80328	-0.04986
-32.5492	-0.802222					2.80728	-0.049854
-32.5452	-0.798439					2.81128	-0.049849
-32.5412	-0.798048					2.81528	-0.049843
-32.5372	-0.798707					2.81928	-0.049837
-32.5332	-0.794294					2.82327	-0.049831
-32.5292	-0.791459					2.82727	-0.049826
-32.5252	-0.79176					2.83127	-0.04982
-32.5212	-0.792847					2.83527	-0.049814
-32.5172	-0.793875					2.83927	-0.049808
-32.5132	-0.795829					2.84327	-0.049804
-32.5092	-0.801602					2.84727	-0.049801
-32.5052	-0.805889					2.85127	-0.049797
-32.5012	-0.808764					2.85527	-0.049793
-32.4972	-0.81291					2.85926	-0.049789
-32.4932	-0.816414					2.86326	-0.049785
-32.4892	-0.817008					2.86726	-0.049781
-32.4852	-0.813692					2.87126	-0.049778
-32.4812	-0.810422					2.87526	-0.049774
-32.4772	-0.807478					2.87926	-0.04977
-32.4732	-0.802585					2.88326	-0.049764
-32.4692	-0.797901					2.88726	-0.049759
-32.4652	-0.795459					2.89126	-0.049753
-32.4612	-0.797781					2.89526	-0.049747
-32.4572	-0.800502					2.89925	-0.049741
-32.4532	-0.799568					2.90326	-0.049736
-32.4492	-0.798667					2.90725	-0.04973
-32.4452	-0.796868					2.91125	-0.049724
-32.4412	-0.797257					2.91525	-0.049719
-32.4372	-0.799273					2.91925	-0.049713
-32.4332	-0.799833					2.92325	-0.049709
-32.4292	-0.802543					2.92725	-0.049705
-32.4252	-0.809752					2.93125	-0.049701
-32.4212	-0.817895					2.93525	-0.049698
-32.4172	-0.819473					2.93924	-0.049694
-32.4132	-0.816026					2.94325	-0.04969
-32.4092	-0.815458					2.94724	-0.049686
-32.4052	-0.81624					2.95124	-0.049682
-32.4012	-0.813806					2.95524	-0.049679
-32.3972	-0.810427					2.95924	-0.049675
-32.3932	-0.809367					2.96324	-0.049671
-32.3892	-0.813396					2.96724	-0.049667
-32.3852	-0.816812					2.97124	-0.049664
-32.3812	-0.817399					2.97524	-0.04966
-32.3772	-0.821184					2.97923	-0.049656
-32.3732	-0.822057					2.98323	-0.049652
-32.3692	-0.82104					2.98723	-0.049648
-32.3652	-0.82343					2.99123	-0.049645
-32.3612	-0.818753					2.99523	-0.049641
-32.3572	-0.815491					2.99923	-0.049637
-32.3532	-0.814668					3.00323	-0.049629
-32.3492	-0.813958					3.00723	-0.049622
-32.3452	-0.814567					3.01123	-0.049614
-32.3412	-0.815176					3.01522	-0.049607
-32.3372	-0.815719					3.01922	-0.049599
-32.3332	-0.816489					3.02322	-0.049592
-32.3292	-0.815842					3.02722	-0.049584
-32.3252	-0.813606					3.03122	-0.049577
-32.3212	-0.813583					3.03522	-0.049569
-32.3172	-0.811104					3.03922	-0.049561
-32.3132	-0.810842					3.04322	-0.049558
-32.3092	-0.811868					3.04722	-0.049554
-32.3052	-0.814105					3.05122	-0.04955
-32.3012	-0.81677					3.05521	-0.049546
-32.2972	-0.820915					3.05921	-0.049543
-32.2932	-0.826605					3.06321	-0.049539
-32.2892	-0.829226					3.06721	-0.049535
-32.2852	-0.829228					3.07121	-0.049531
-32.2812	-0.831301					3.07521	-0.049528
-32.2772	-0.832237					3.07921	-0.049524
-32.2732	-0.832396					3.08321	-0.04952
-32.2692	-0.829431					3.08721	-0.049517
-32.2652	-0.829681					3.09121	-0.049513
-32.2612	-0.832025					3.0952	-0.049509
-32.2572	-0.833636					3.0992	-0.049505
-32.2532	-0.835314					3.1032	-0.049502
-32.2492	-0.837136					3.1072	-0.049498
-32.2452	-0.841371					3.1112	-0.049494
-32.2412	-0.843884					3.1152	-0.04949
-32.2373	-0.846474					3.1192	-0.049487
-32.2333	-0.847407					3.1232	-0.049479
-32.2293	-0.846196					3.1272	-0.049472
-32.2253	-0.847268					3.13119	-0.049464
-32.2213	-0.846617					3.13519	-0.049457
-32.2173	-0.845403					3.13919	-0.049449
-32.2133	-0.846363					3.14319	-0.049442
-32.2093	-0.847165					3.14719	-0.049434
-32.2053	-0.844206					3.15119	-0.049427
-32.2013	-0.841129					3.15519	-0.04942
-32.1973	-0.838902					3.15919	-0.049412
-32.1933	-0.838455					3.16318	-0.049408
-32.1893	-0.834873					3.16719	-0.049405
-32.1853	-0.832934					3.17118	-0.049401
-32.1813	-0.833921					3.17518	-0.049397
-32.1773	-0.837224					3.17918	-0.049394
-32.1733	-0.840677					3.18318	-0.04939
-32.1693	-0.839742					3.18718	-0.049386
-32.1653	-0.840038					3.19118	-0.049383
-32.1613	-0.839862					3.19518	-0.049379
-32.1573	-0.841245					3.19918	-0.049375
-32.1533	-0.842234					3.20318	-0.049371
-32.1493	-0.838736					3.20718	-0.049368
-32.1453	-0.840133					3.21117	-0.049364
-32.1413	-0.841078					3.21517	-0.04936
-32.1373	-0.843989					3.21917	-0.049357
-32.1333	-0.843122					3.22317	-0.049353
-32.1293	-0.843844					3.22717	-0.049349
-32.1253	-0.843866					3.23117	-0.049346
-32.1213	-0.84158					3.23517	-0.049342
-32.1173	-0.840165					3.23917	-0.049338
-32.1133	-0.837616					3.24317	-0.049331
-32.1093	-0.834988					3.24717	-0.049324
-32.1053	-0.829284					3.25116	-0.049316
-32.1013	-0.825437					3.25516	-0.049309
-32.0973	-0.825005					3.25916	-0.049302
-32.0933	-0.826365					3.26316	-0.049294
-32.0893	-0.828857					3.26716	-0.049287
-32.0853	-0.832718					3.27116	-0.04928
-32.0813	-0.836894					3.27516	-0.049272
-32.0773	-0.840517					3.27916	-0.049265
-32.0733	-0.84196					3.28316	-0.049261
-32.0693	-0.843467					3.28715	-0.049258
-32.0653	-0.845054					3.29115	-0.049254
-32.0613	-0.844054					3.29515	-0.04925
-32.0573	-0.847429					3.29915	-0.049247
-32.0533	-0.849783					3.30315	-0.049243
-32.0493	-0.857362					3.30715	-0.049239
-32.0453	-0.861589					3.31115	-0.049236
-32.0413	-0.864527					3.31515	-0.049232
-32.0373	-0.866049					3.31914	-0.049228
-32.0333	-0.86603					3.32315	-0.049221
-32.0293	-0.867314					3.32714	-0.049214
-32.0253	-0.866614					3.33114	-0.049207
-32.0213	-0.865766					3.33514	-0.049199
-32.0173	-0.864839					3.33914	-0.049192
-32.0133	-0.866214					3.34314	-0.049185
-32.0093	-0.865181					3.34714	-0.049178
-32.0053	-0.865283					3.35114	-0.04917
-32.0013	-0.865221					3.35514	-0.049163
-31.9973	-0.867234					3.35914	-0.049156
-31.9933	-0.864779					3.36314	-0.049152
-31.9893	-0.860703					3.36713	-0.049149
-31.9853	-0.858697					3.37113	-0.049145
-31.9813	-0.863443					3.37513	-0.049141
-31.9773	-0.86366					3.37913	-0.049138
-31.9733	-0.863984					3.38313	-0.049134
-31.9693	-0.867075					3.38713	-0.049131
-31.9653	-0.87196					3.39113	-0.049127
-31.9613	-0.879329					3.39513	-0.049123
-31.9573	-0.881632					3.39913	-0.04912
-31.9533	-0.881459					3.40313	-0.049116
-31.9493	-0.876239					3.40712	-0.049113
-31.9453	-0.872795					3.41112	-0.049109
-31.9413	-0.872849					3.41512	-0.049105
-31.9373	-0.873015					3.41912	-0.049102
-31.9333	-0.871116					3.42312	-0.049098
-31.9293	-0.868933					3.42712	-0.049095
-31.9253	-0.87086					3.43112	-0.049091
-31.9213	-0.873094					3.43512	-0.049088
-31.9173	-0.873788					3.43912	-0.049084
-31.9133	-0.874647					3.44312	-0.049077
-31.9093	-0.872378					3.44711	-0.04907
-31.9053	-0.872766					3.45112	-0.049063
-31.9013	-0.874277					3.45511	-0.049055
-31.8973	-0.877241					3.45911	-0.049048
-31.8933	-0.878633					3.46311	-0.049041
-31.8893	-0.876696					3.46711	-0.049034
-31.8853	-0.878423					3.47111	-0.049027
-31.8813	-0.879002					3.47511	-0.04902
-31.8773	-0.876724					3.47911	-0.049012
-31.8733	-0.874041					3.48311	-0.049009
-31.8693	-0.871374					3.4871	-0.049005
-31.8653	-0.87047					3.4911	-0.049002
-31.8613	-0.869273					3.4951	-0.048998
-31.8573	-0.867989					3.4991	-0.048995
-31.8533	-0.869101					3.5031	-0.048991
-31.8494	-0.869021					3.5071	-0.048988
-31.8454	-0.867277					3.5111	-0.048984
-31.8414	-0.86557					3.5151	-0.048981
-31.8374	-0.863701					3.5191	-0.048977
-31.8334	-0.861284					3.52309	-0.048974
-31.8294	-0.858445					3.52709	-0.04897
-31.8254	-0.856906					3.53109	-0.048966
-31.8214	-0.856751					3.53509	-0.048963
-31.8174	-0.856642					3.53909	-0.048959
-31.8134	-0.857307					3.54309	-0.048956
-31.8094	-0.85993					3.54709	-0.048952
-31.8054	-0.860661					3.55109	-0.048949
-31.8014	-0.864387					3.55508	-0.048945
-31.7974	-0.867393					3.55909	-0.048942
-31.7934	-0.869925					3.56308	-0.048935
-31.7894	-0.87118					3.56708	-0.048928
-31.7854	-0.867095					3.57108	-0.048921
-31.7814	-0.868652					3.57508	-0.048914
-31.7774	-0.869341					3.57908	-0.048907
-31.7734	-0.869279					3.58308	-0.0489
-31.7694	-0.866355					3.58708	-0.048893
-31.7654	-0.864054					3.59108	-0.048886
-31.7614	-0.866693					3.59508	-0.048879
-31.7574	-0.867721					3.59908	-0.048872
-31.7534	-0.868243					3.60307	-0.048868
-31.7494	-0.866505					3.60707	-0.048865
-31.7454	-0.869709					3.61107	-0.048861
-31.7414	-0.874293					3.61507	-0.048858
-31.7374	-0.876401					3.61907	-0.048854
-31.7334	-0.877453					3.62307	-0.048851
-31.7294	-0.879401					3.62707	-0.048847
-31.7254	-0.881177					3.63106	-0.048844
-31.7214	-0.880971					3.63507	-0.04884
-31.7174	-0.882229					3.63906	-0.048837
-31.7134	-0.883898					3.64306	-0.04883
-31.7094	-0.884995					3.64706	-0.048823
-31.7054	-0.884173					3.65106	-0.048816
-31.7014	-0.885444					3.65506	-0.048809
-31.6974	-0.88549					3.65906	-0.048802
-31.6934	-0.885592					3.66306	-0.048795
-31.6894	-0.884707					3.66706	-0.048788
-31.6854	-0.886769					3.67105	-0.048781
-31.6814	-0.88946					3.67506	-0.048774
-31.6774	-0.891134					3.67905	-0.048767
-31.6734	-0.895299					3.68305	-0.048764
-31.6694	-0.897039					3.68705	-0.048761
-31.6654	-0.900128					3.69105	-0.048757
-31.6614	-0.900495					3.69505	-0.048754
-31.6574	-0.90165					3.69905	-0.04875
-31.6534	-0.902633					3.70305	-0.048747
-31.6494	-0.902674					3.70705	-0.048743
-31.6454	-0.905264					3.71104	-0.04874
-31.6414	-0.906874					3.71505	-0.048736
-31.6374	-0.908411					3.71904	-0.048733
-31.6334	-0.907795					3.72304	-0.048726
-31.6294	-0.905086					3.72704	-0.048719
-31.6254	-0.904932					3.73104	-0.048713
-31.6214	-0.905644					3.73504	-0.048706
-31.6174	-0.902889					3.73904	-0.048699
-31.6134	-0.899765					3.74304	-0.048692
-31.6094	-0.89828					3.74704	-0.048685
-31.6054	-0.899961					3.75104	-0.048678
-31.6014	-0.901859					3.75503	-0.048671
-31.5974	-0.902191					3.75903	-0.048665
-31.5934	-0.90435					3.76303	-0.048661
-31.5894	-0.908694					3.76703	-0.048658
-31.5854	-0.912601					3.77103	-0.048654
-31.5814	-0.912611					3.77503	-0.048651
-31.5774	-0.912057					3.77903	-0.048648
-31.5734	-0.913223					3.78303	-0.048644
-31.5694	-0.913039					3.78702	-0.048641
-31.5654	-0.913108					3.79103	-0.048638
-31.5614	-0.913382					3.79502	-0.048634
-31.5574	-0.920043					3.79902	-0.048631
-31.5534	-0.924629					3.80302	-0.048627
-31.5494	-0.924464					3.80702	-0.048624
-31.5454	-0.92458					3.81102	-0.048621
-31.5414	-0.92383					3.81502	-0.048617
-31.5374	-0.921631					3.81902	-0.048614
-31.5334	-0.920432					3.82302	-0.048611
-31.5294	-0.918301					3.82701	-0.048607
-31.5254	-0.916218					3.83102	-0.048604
-31.5214	-0.917173					3.83501	-0.0486
-31.5174	-0.919211					3.83901	-0.048597
-31.5134	-0.921954					3.84301	-0.04859
-31.5094	-0.922772					3.84701	-0.048584
-31.5054	-0.923196					3.85101	-0.048577
-31.5014	-0.926277					3.85501	-0.04857
-31.4974	-0.925621					3.85901	-0.048564
-31.4934	-0.924135					3.86301	-0.048557
-31.4894	-0.923675					3.867	-0.04855
-31.4854	-0.921383					3.87101	-0.048543
-31.4814	-0.920574					3.875	-0.048537
-31.4774	-0.91959					3.879	-0.04853
-31.4734	-0.918997					3.883	-0.048527
-31.4694	-0.91946					3.887	-0.048523
-31.4655	-0.919987					3.891	-0.04852
-31.4615	-0.922634					3.895	-0.048517
-31.4575	-0.927474					3.899	-0.048513
-31.4535	-0.92871					3.903	-0.04851
-31.4495	-0.92529					3.90699	-0.048507
-31.4455	-0.924854					3.911	-0.048503
-31.4415	-0.926526					3.91499	-0.0485
-31.4375	-0.928364					3.91899	-0.048497
-31.4335	-0.927618					3.92299	-0.04849
-31.4295	-0.925974					3.92699	-0.048484
-31.4255	-0.930391					3.93099	-0.048477
-31.4215	-0.934938					3.93499	-0.04847
-31.4175	-0.936734					3.93899	-0.048464
-31.4135	-0.93284					3.94299	-0.048457
-31.4095	-0.931181					3.94699	-0.04845
-31.4055	-0.932514					3.95099	-0.048444
-31.4015	-0.936103					3.95498	-0.048437
-31.3975	-0.941522					3.95898	-0.048431
-31.3935	-0.943121					3.96298	-0.048427
-31.3895	-0.948565					3.96698	-0.048424
-31.3855	-0.94874					3.97098	-0.048421
-31.3815	-0.946161					3.97498	-0.048418
-31.3775	-0.946586					3.97898	-0.048414
-31.3735	-0.945846					3.98298	-0.048411
-31.3695	-0.93999					3.98698	-0.048408
-31.3655	-0.936561					3.99097	-0.048404
-31.3615	-0.935821					3.99497	-0.048401
-31.3575	-0.943735					3.99897	-0.048398
-31.3535	-0.946201					4.00297	-0.048391
-31.3495	-0.943191					4.00697	-0.048385
-31.3455	-0.946735					4.01097	-0.048378
-31.3415	-0.948609					4.01497	-0.048372
-31.3375	-0.952171					4.01897	-0.048365
-31.3335	-0.950002					4.02296	-0.048359
-31.3295	-0.948911					4.02697	-0.048352
-31.3255	-0.950208					4.03096	-0.048346
-31.3215	-0.948635					4.03496	-0.048339
-31.3175	-0.952568					4.03896	-0.048333
-31.3135	-0.953257					4.04296	-0.048329
-31.3095	-0.955083					4.04696	-0.048326
-31.3055	-0.958034					4.05096	-0.048323
-31.3015	-0.960896					4.05496	-0.04832
-31.2975	-0.963715					4.05896	-0.048317
-31.2935	-0.963194					4.06295	-0.048313
-31.2895	-0.961887					4.06696	-0.04831
-31.2855	-0.960006					4.07095	-0.048307
-31.2815	-0.956234					4.07495	-0.048304
-31.2775	-0.952932					4.07895	-0.0483
-31.2735	-0.947413					4.08295	-0.048294
-31.2695	-0.946864					4.08695	-0.048288
-31.2655	-0.949788					4.09095	-0.048281
-31.2615	-0.953032					4.09495	-0.048275
-31.2575	-0.954737					4.09895	-0.048268
-31.2535	-0.955765					4.10294	-0.048262
-31.2495	-0.960322					4.10694	-0.048256
-31.2455	-0.964075					4.11094	-0.048249
-31.2415	-0.965955					4.11494	-0.048243
-31.2375	-0.966516					4.11894	-0.048236
-31.2335	-0.967665					4.12294	-0.048233
-31.2295	-0.970079					4.12694	-0.04823
-31.2255	-0.97187					4.13094	-0.048227
-31.2215	-0.969584					4.13494	-0.048224
-31.2175	-0.966841					4.13894	-0.04822
-31.2135	-0.965385					4.14294	-0.048217
-31.2095	-0.96248					4.14694	-0.048214
-31.2055	-0.96182					4.15093	-0.048211
-31.2015	-0.960309					4.15493	-0.048208
-31.1975	-0.959722					4.15893	-0.048205
-31.1935	-0.960886					4.16293	-0.048198
-31.1895	-0.960876					4.16693	-0.048192
-31.1855	-0.962413					4.17093	-0.048186
-31.1815	-0.962158					4.17493	-0.048179
-31.1775	-0.959352					4.17892	-0.048173
-31.1735	-0.957327					4.18293	-0.048167
-31.1695	-0.957482					4.18692	-0.04816
-31.1655	-0.956936					4.19092	-0.048154
-31.1615	-0.955885					4.19492	-0.048148
-31.1575	-0.957108					4.19892	-0.048141
-31.1535	-0.959624					4.20292	-0.048138
-31.1495	-0.963922					4.20692	-0.048135
-31.1455	-0.966292					4.21092	-0.048132
-31.1415	-0.967968					4.21492	-0.048129
-31.1375	-0.96713					4.21891	-0.048126
-31.1335	-0.968101					4.22292	-0.048123
-31.1295	-0.968091					4.22691	-0.048119
-31.1255	-0.966773					4.23091	-0.048116
-31.1215	-0.964576					4.23491	-0.048113
-31.1175	-0.964133					4.23891	-0.04811
-31.1135	-0.968954					4.24291	-0.048104
-31.1095	-0.967372					4.24691	-0.048098
-31.1055	-0.969907					4.25091	-0.048091
-31.1015	-0.974581					4.25491	-0.048085
-31.0975	-0.977828					4.2589	-0.048079
-31.0935	-0.97983					4.2629	-0.048073
-31.0895	-0.979117					4.2669	-0.048067
-31.0855	-0.981175					4.2709	-0.04806
-31.0815	-0.981279					4.2749	-0.048054
-31.0775	-0.980127					4.2789	-0.048048
-31.0736	-0.981327					4.2829	-0.048042
-31.0696	-0.981241					4.2869	-0.048036
-31.0656	-0.982294					4.2909	-0.048029
-31.0616	-0.986099					4.2949	-0.048023
-31.0576	-0.990552					4.2989	-0.048017
-31.0536	-0.995398					4.3029	-0.048011
-31.0496	-0.998316					4.30689	-0.048005
-31.0456	-1.00005					4.31089	-0.047999
-31.0416	-1.00255					4.31489	-0.047993
-31.0376	-1.00424					4.31889	-0.047986
-31.0336	-1.00352					4.32289	-0.047983
-31.0296	-1.00267					4.32689	-0.04798
-31.0256	-0.998638					4.33089	-0.047977
-31.0216	-0.995698					4.33488	-0.047974
-31.0176	-0.995222					4.33889	-0.047971
-31.0136	-0.99456					4.34288	-0.047968
-31.0096	-0.994653					4.34688	-0.047965
-31.0056	-0.995541					4.35088	-0.047962
-31.0016	-0.995286					4.35488	-0.047959
-30.9976	-1.00061					4.35888	-0.047956
-30.9936	-1.00518					4.36288	-0.04795
-30.9896	-1.00869					4.36688	-0.047944
-30.9856	-1.00697					4.37088	-0.047938
-30.9816	-1.00575					4.37487	-0.047932
-30.9776	-1.00829					4.37888	-0.047926
-30.9736	-1.00844					4.38287	-0.04792
-30.9696	-1.00774					4.38687	-0.047914
-30.9656	-1.00305					4.39087	-0.047908
-30.9616	-1.00277					4.39487	-0.047901
-30.9576	-1.00452					4.39887	-0.047895
-30.9536	-1.00628					4.40287	-0.047892
-30.9496	-1.00632					4.40687	-0.047889
-30.9456	-1.00674					4.41087	-0.047886
-30.9416	-1.01174					4.41486	-0.047883
-30.9376	-1.01672					4.41887	-0.04788
-30.9336	-1.01794					4.42286	-0.047877
-30.9296	-1.01889					4.42686	-0.047874
-30.9256	-1.01997					4.43086	-0.047871
-30.9216	-1.0233					4.43486	-0.047869
-30.9176	-1.02145					4.43886	-0.047866
-30.9136	-1.02225					4.44286	-0.04786
-30.9096	-1.02466					4.44686	-0.047854
-30.9056	-1.02619					4.45085	-0.047848
-30.9016	-1.02736					4.45485	-0.047842
-30.8976	-1.02752					4.45885	-0.047836
-30.8936	-1.02944					4.46285	-0.04783
-30.8896	-1.02935					4.46685	-0.047824
-30.8856	-1.03052					4.47085	-0.047818
-30.8816	-1.03073					4.47485	-0.047812
-30.8776	-1.02788					4.47885	-0.047806
-30.8736	-1.02796					4.48285	-0.0478
-30.8696	-1.0303					4.48685	-0.047794
-30.8656	-1.03016					4.49085	-0.047788
-30.8616	-1.02706					4.49485	-0.047782
-30.8576	-1.02356					4.49884	-0.047777
-30.8536	-1.02385					4.50284	-0.047771
-30.8496	-1.02667					4.50684	-0.047765
-30.8456	-1.02555					4.51084	-0.047759
-30.8416	-1.02609					4.51484	-0.047753
-30.8376	-1.02917					4.51884	-0.047747
-30.8336	-1.03352					4.52284	-0.047744
-30.8296	-1.03878					4.52684	-0.047741
-30.8256	-1.04129					4.53083	-0.047738
-30.8216	-1.04374					4.53484	-0.047735
-30.8176	-1.04487					4.53883	-0.047733
-30.8136	-1.04735					4.54283	-0.04773
-30.8096	-1.05126					4.54683	-0.047727
-30.8056	-1.05626					4.55083	-0.047724
-30.8016	-1.05723					4.55483	-0.047721
-30.7976	-1.0571					4.55883	-0.047718
-30.7936	-1.0577					4.56283	-0.047712
-30.7896	-1.05617					4.56683	-0.047706
-30.7856	-1.05416					4.57082	-0.047701
-30.7816	-1.0509					4.57482	-0.047695
-30.7776	-1.04916					4.57882	-0.047689
-30.7736	-1.04933					4.58282	-0.047683
-30.7696	-1.05045					4.58682	-0.047678
-30.7656	-1.05597					4.59082	-0.047672
-30.7616	-1.05638					4.59482	-0.047666
-30.7576	-1.05611					4.59882	-0.04766
-30.7536	-1.05696					4.60282	-0.047657
-30.7496	-1.05758					4.60682	-0.047654
-30.7456	-1.0574					4.61081	-0.047652
-30.7416	-1.05618					4.61482	-0.047649
-30.7376	-1.05534					4.61881	-0.047646
-30.7336	-1.05574					4.62281	-0.047643
-30.7296	-1.05349					4.62681	-0.04764
-30.7256	-1.0559					4.63081	-0.047637
-30.7216	-1.05889					4.63481	-0.047634
-30.7176	-1.05704					4.63881	-0.047632
-30.7136	-1.05694					4.64281	-0.047626
-30.7096	-1.05677					4.6468	-0.04762
-30.7056	-1.05621					4.6508	-0.047615
-30.7016	-1.0544					4.6548	-0.047609
-30.6976	-1.05229					4.6588	-0.047603
-30.6936	-1.05345					4.6628	-0.047597
-30.6896	-1.05573					4.6668	-0.047592
-30.6856	-1.0581					4.6708	-0.047586
-30.6817	-1.06015					4.6748	-0.04758
-30.6777	-1.06059					4.6788	-0.047575
-30.6737	-1.0577					4.6828	-0.047569
-30.6697	-1.05401					4.68679	-0.047563
-30.6657	-1.05278					4.6908	-0.047558
-30.6617	-1.05374					4.69479	-0.047552
-30.6577	-1.05715					4.69879	-0.047547
-30.6537	-1.05991					4.70279	-0.047541
-30.6497	-1.06154					4.70679	-0.047535
-30.6457	-1.06165					4.71079	-0.04753
-30.6417	-1.06307					4.71479	-0.047524
-30.6377	-1.06205					4.71879	-0.047518
-30.6337	-1.061					4.72279	-0.047513
-30.6297	-1.05691					4.72678	-0.047507
-30.6257	-1.05768					4.73079	-0.047502
-30.6217	-1.05713					4.73478	-0.047496
-30.6177	-1.05856					4.73878	-0.047491
-30.6137	-1.06013					4.74278	-0.047485
-30.6097	-1.05983					4.74678	-0.04748
-30.6057	-1.05948					4.75078	-0.047474
-30.6017	-1.05905					4.75478	-0.047468
-30.5977	-1.06016					4.75878	-0.047463
-30.5937	-1.0599					4.76278	-0.04746
-30.5897	-1.05626					4.76677	-0.047457
-30.5857	-1.05349					4.77078	-0.047455
-30.5817	-1.05272					4.77477	-0.047452
-30.5777	-1.04999					4.77877	-0.047449
-30.5737	-1.04961					4.78277	-0.047446
-30.5697	-1.0514					4.78677	-0.047444
-30.5657	-1.05192					4.79077	-0.047441
-30.5617	-1.05525					4.79477	-0.047438
-30.5577	-1.06086					4.79877	-0.047435
-30.5537	-1.06535					4.80276	-0.04743
-30.5497	-1.07023					4.80676	-0.048576
-30.5457	-1.07526					4.81076	-0.048237
-30.5417	-1.07633					4.81476	-0.047414
-30.5377	-1.07649					4.81876	-0.047876
-30.5337	-1.07488					4.82276	-0.047403
-30.5297	-1.07412					4.82676	-0.047397
-30.5257	-1.074					4.83076	-0.047392
-30.5217	-1.07374					4.83476	-0.047386
-30.5177	-1.07448					4.83876	-0.048961
-30.5137	-1.07324					4.84275	-0.047375
-30.5097	-1.07395					4.84676	-0.04737
-30.5057	-1.07476					4.85075	-0.047365
-30.5017	-1.07487					4.85475	-0.047359
-30.4977	-1.06986					4.85875	-0.047354
-30.4937	-1.06642					4.86275	-0.047349
-30.4897	-1.06945					4.86675	-0.047343
-30.4857	-1.07117					4.87075	-0.047338
-30.4817	-1.07238					4.87475	-0.047332
-30.4777	-1.07203					4.87875	-0.047327
-30.4737	-1.07524					4.88274	-0.047322
-30.4697	-1.07688					4.88675	-0.047316
-30.4657	-1.07667					4.89074	-0.047311
-30.4617	-1.07783					4.89474	-0.047306
-30.4577	-1.07707					4.89874	-0.0473
-30.4537	-1.07702					4.90274	-0.047295
-30.4497	-1.07958					4.90674	-0.04729
-30.4457	-1.08251					4.91074	-0.047284
-30.4417	-1.08644					4.91474	-0.047279
-30.4377	-1.08476					4.91874	-0.047274
-30.4337	-1.08442					4.92273	-0.047271
-30.4297	-1.08724					4.92673	-0.047268
-30.4257	-1.08977					4.93073	-0.047266
-30.4217	-1.09314					4.93473	-0.047263
-30.4177	-1.09281					4.93873	-0.047261
-30.4137	-1.09769					4.94273	-0.047258
-30.4097	-1.10406					4.94673	-0.047255
-30.4057	-1.10758					4.95073	-0.047253
-30.4017	-1.1071					4.95473	-0.04725
-30.3977	-1.10622					4.95873	-0.047247
-30.3937	-1.10283					4.96272	-0.047242
-30.3897	-1.10111					4.96672	-0.047237
-30.3857	-1.10089					4.97072	-0.047232
-30.3817	-1.09366					4.97472	-0.047226
-30.3777	-1.09215					4.97872	-0.047221
-30.3737	-1.09197					4.98272	-0.047216
-30.3697	-1.09427					4.98672	-0.047211
-30.3657	-1.0957					4.99072	-0.047206
-30.3617	-1.09359					4.99472	-0.0472
-30.3577	-1.0978					4.99871	-0.047195
-30.3537	-1.10117					5.00271	-0.04719
-30.3497	-1.10248					5.00671	-0.047185
-30.3457	-1.101					5.01071	-0.04718
-30.3417	-1.1017					5.01471	-0.047174
-30.3377	-1.10123					5.01871	-0.047169
-30.3337	-1.10258					5.02271	-0.047164
-30.3297	-1.10206					5.02671	-0.047159
-30.3257	-1.10332					5.03071	-0.047154
-30.3217	-1.10304					5.03471	-0.047149
-30.3177	-1.10453					5.0387	-0.047143
-30.3137	-1.10496					5.04271	-0.047138
-30.3097	-1.10472					5.0467	-0.047133
-30.3057	-1.10712					5.0507	-0.047128
-30.3017	-1.10797					5.0547	-0.047123
-30.2977	-1.1117					5.0587	-0.047118
-30.2938	-1.11623					5.0627	-0.047113
-30.2898	-1.12278					5.0667	-0.047108
-30.2858	-1.12814					5.0707	-0.047103
-30.2818	-1.131					5.0747	-0.047097
-30.2778	-1.13308					5.07869	-0.047092
-30.2738	-1.13278					5.0827	-0.047087
-30.2698	-1.13154					5.08669	-0.047082
-30.2658	-1.12739					5.09069	-0.047077
-30.2618	-1.12728					5.09469	-0.047072
-30.2578	-1.12484					5.09869	-0.047067
-30.2538	-1.12431					5.10269	-0.047062
-30.2498	-1.12702					5.10669	-0.047057
-30.2458	-1.12956					5.11069	-0.047052
-30.2418	-1.12826					5.11468	-0.047047
-30.2378	-1.12855					5.11868	-0.047042
-30.2338	-1.12989					5.12268	-0.047039
-30.2298	-1.12972					5.12668	-0.047037
-30.2258	-1.12865					5.13068	-0.047034
-30.2218	-1.12513					5.13468	-0.047032
-30.2178	-1.12579					5.13868	-0.04703
-30.2138	-1.12639					5.14268	-0.047027
-30.2098	-1.1254					5.14668	-0.047025
-30.2058	-1.12561					5.15068	-0.047022
-30.2018	-1.12594					5.15468	-0.04702
-30.1978	-1.12747					5.15867	-0.047017
-30.1938	-1.13031					5.16267	-0.047012
-30.1898	-1.13093					5.16667	-0.047007
-30.1858	-1.13064					5.17067	-0.047002
-30.1818	-1.13243					5.17467	-0.046997
-30.1778	-1.13243					5.17867	-0.046992
-30.1738	-1.13352					5.18267	-0.046987
-30.1698	-1.13449					5.18667	-0.046982
-30.1658	-1.13549					5.19067	-0.046977
-30.1618	-1.13883					5.19466	-0.046973
-30.1578	-1.13737					5.19866	-0.046968
-30.1538	-1.13529					5.20266	-0.046963
-30.1498	-1.13634					5.20666	-0.046958
-30.1458	-1.13496					5.21066	-0.046953
-30.1418	-1.13845					5.21466	-0.046948
-30.1378	-1.14103					5.21866	-0.046943
-30.1338	-1.14534					5.22266	-0.046938
-30.1298	-1.15049					5.22666	-0.046933
-30.1258	-1.15038					5.23066	-0.046929
-30.1218	-1.15405					5.23465	-0.046924
-30.1178	-1.15512					5.23865	-0.046919
-30.1138	-1.15519					5.24265	-0.046914
-30.1098	-1.15686					5.24665	-0.046909
-30.1058	-1.15763					5.25065	-0.046904
-30.1018	-1.15941					5.25465	-0.046899
-30.0978	-1.15819					5.25865	-0.046895
-30.0938	-1.15442					5.26265	-0.04689
-30.0898	-1.15025					5.26665	-0.046885
-30.0858	-1.14806					5.27065	-0.04688
-30.0818	-1.14557					5.27464	-0.046875
-30.0778	-1.14626					5.27865	-0.046871
-30.0738	-1.14758					5.28264	-0.046866
-30.0698	-1.15012					5.28664	-0.046861
-30.0658	-1.15454					5.29064	-0.046856
-30.0618	-1.15456					5.29464	-0.046851
-30.0578	-1.15379					5.29864	-0.046847
-30.0538	-1.15317					5.30264	-0.046842
-30.0498	-1.15327					5.30664	-0.046837
-30.0458	-1.15338					5.31064	-0.046832
-30.0418	-1.15132					5.31463	-0.046828
-30.0378	-1.15232					5.31863	-0.046823
-30.0338	-1.15349					5.32263	-0.046818
-30.0298	-1.15255					5.32663	-0.046814
-30.0258	-1.15685					5.33063	-0.046809
-30.0218	-1.16043					5.33463	-0.046804
-30.0178	-1.16379					5.33863	-0.046799
-30.0138	-1.16633					5.34263	-0.046795
-30.0098	-1.16847					5.34663	-0.04679
-30.0058	-1.16817					5.35062	-0.046785
-30.0018	-1.16294					5.35462	-0.046781
-29.9978	-1.15984					5.35862	-0.046776
-29.9938	-1.15559					5.36262	-0.046771
-29.9898	-1.15105					5.36662	-0.046767
-29.9858	-1.15056					5.37062	-0.046762
-29.9818	-1.15228					5.37462	-0.046757
-29.9778	-1.15803					5.37862	-0.046753
-29.9738	-1.15823					5.38262	-0.046748
-29.9698	-1.16105					5.38662	-0.046743
-29.9658	-1.16686					5.39061	-0.046739
-29.9618	-1.16887					5.39461	-0.046734
-29.9578	-1.16841					5.39861	-0.046729
-29.9538	-1.17187					5.40261	-0.046725
-29.9498	-1.17341					5.40661	-0.04672
-29.9458	-1.17523					5.41061	-0.046716
-29.9418	-1.17499					5.41461	-0.046711
-29.9378	-1.17554					5.41861	-0.046707
-29.9338	-1.17569					5.42261	-0.046702
-29.9298	-1.17568					5.42661	-0.046697
-29.9258	-1.17827					5.4306	-0.046693
-29.9218	-1.18271					5.43461	-0.046688
-29.9178	-1.18717					5.4386	-0.046684
-29.9138	-1.19066					5.4426	-0.046679
-29.9098	-1.19429					5.4466	-0.046675
-29.9058	-1.19476					5.4506	-0.04667
-29.9019	-1.19442					5.4546	-0.046666
-29.8979	-1.192					5.45859	-0.046661
-29.8939	-1.19066					5.4626	-0.046657
-29.8899	-1.18909					5.46659	-0.046652
-29.8859	-1.18852					5.47059	-0.046648
-29.8819	-1.19197					5.47459	-0.046643
-29.8779	-1.19459					5.47859	-0.046638
-29.8739	-1.1945					5.48259	-0.046634
-29.8699	-1.19333					5.48659	-0.04663
-29.8659	-1.19306					5.49059	-0.046625
-29.8619	-1.19519					5.49459	-0.046621
-29.8579	-1.19505					5.49859	-0.046616
-29.8539	-1.19099					5.50259	-0.046612
-29.8499	-1.19193					5.50658	-0.046607
-29.8459	-1.19346					5.51058	-0.046603
-29.8419	-1.19308					5.51458	-0.046598
-29.8379	-1.18993					5.51858	-0.046594
-29.8339	-1.18681					5.52258	-0.046589
-29.8299	-1.18877					5.52658	-0.046585
-29.8259	-1.18687					5.53058	-0.046581
-29.8219	-1.18454					5.53458	-0.046576
-29.8179	-1.18426					5.53858	-0.046572
-29.8139	-1.18459					5.54258	-0.046567
-29.8099	-1.18616					5.54657	-0.046563
-29.8059	-1.18639					5.55057	-0.046559
-29.8019	-1.18585					5.55457	-0.046554
-29.7979	-1.18868					5.55857	-0.04655
-29.7939	-1.19197					5.56257	-0.046545
-29.7899	-1.19098					5.56657	-0.046541
-29.7859	-1.1922					5.57057	-0.046537
-29.7819	-1.19211					5.57457	-0.046532
-29.7779	-1.19216					5.57857	-0.046528
-29.7739	-1.19324					5.58256	-0.046524
-29.7699	-1.19251					5.58656	-0.046519
-29.7659	-1.19321					5.59056	-0.046515
-29.7619	-1.1913					5.59456	-0.046511
-29.7579	-1.18926					5.59856	-0.046506
-29.7539	-1.19035					5.60256	-0.046502
-29.7499	-1.18963					5.60656	-0.046498
-29.7459	-1.18874					5.61056	-0.046493
-29.7419	-1.18897					5.61456	-0.046489
-29.7379	-1.19015					5.61856	-0.046485
-29.7339	-1.19365					5.62256	-0.046481
-29.7299	-1.19769					5.62655	-0.046476
-29.7259	-1.19927					5.63055	-0.046472
-29.7219	-1.20295					5.63455	-0.046468
-29.7179	-1.20816					5.63855	-0.046463
-29.7139	-1.21359					5.64255	-0.046459
-29.7099	-1.21454					5.64655	-0.046455
-29.7059	-1.21361					5.65055	-0.046451
-29.7019	-1.21373					5.65454	-0.046447
-29.6979	-1.20976					5.65855	-0.046442
-29.6939	-1.20774					5.66254	-0.046438
-29.6899	-1.20571					5.66654	-0.046434
-29.6859	-1.20451					5.67054	-0.04643
-29.6819	-1.20524					5.67454	-0.046425
-29.6779	-1.20683					5.67854	-0.046421
-29.6739	-1.20937					5.68254	-0.046417
-29.6699	-1.21109					5.68654	-0.046413
-29.6659	-1.21308					5.69054	-0.046409
-29.6619	-1.21627					5.69453	-0.046404
-29.6579	-1.2212					5.69854	-0.0464
-29.6539	-1.21943					5.70253	-0.046396
-29.6499	-1.2217					5.70653	-0.046392
-29.6459	-1.22372					5.71053	-0.046388
-29.6419	-1.22309					5.71453	-0.046384
-29.6379	-1.22311					5.71853	-0.046379
-29.6339	-1.22223					5.72253	-0.046375
-29.6299	-1.22447					5.72653	-0.046371
-29.6259	-1.22806					5.73053	-0.046367
-29.6219	-1.2288					5.73453	-0.046363
-29.6179	-1.22962					5.73853	-0.046359
-29.6139	-1.23014					5.74252	-0.046355
-29.6099	-1.23161					5.74652	-0.04635
-29.6059	-1.23259					5.75052	-0.046346
-29.6019	-1.23443					5.75452	-0.046342
-29.5979	-1.23524					5.75852	-0.046338
-29.5939	-1.23643					5.76252	-0.04633
-29.5899	-1.23813					5.76652	-0.046322
-29.5859	-1.24023					5.77051	-0.046314
-29.5819	-1.24064					5.77452	-0.046306
-29.5779	-1.23796					5.77851	-0.046297
-29.5739	-1.23779					5.78251	-0.046289
-29.5699	-1.23977					5.78651	-0.046281
-29.5659	-1.23977					5.79051	-0.046273
-29.5619	-1.23538					5.79451	-0.046265
-29.5579	-1.23299					5.79851	-0.046257
-29.5539	-1.23424					5.80251	-0.046253
-29.5499	-1.23411					5.80651	-0.046249
-29.5459	-1.23233					5.81051	-0.046245
-29.5419	-1.23164					5.81451	-0.046241
-29.5379	-1.23471					5.8185	-0.046237
-29.5339	-1.23658					5.8225	-0.046233
-29.5299	-1.2373					5.8265	-0.046229
-29.5259	-1.24016					5.8305	-0.046225
-29.522	-1.23912					5.8345	-0.046221
-29.5179	-1.23981					5.8385	-0.046217
-29.514	-1.24039					5.8425	-0.046213
-29.51	-1.24032					5.8465	-0.046209
-29.506	-1.24093					5.85049	-0.046205
-29.502	-1.2392					5.8545	-0.046202
-29.498	-1.24233					5.85849	-0.046198
-29.494	-1.24019					5.86249	-0.046194
-29.49	-1.23771					5.86649	-0.04619
-29.486	-1.23875					5.87049	-0.046186
-29.482	-1.24096					5.87449	-0.046182
-29.478	-1.24041					5.87849	-0.046178
-29.474	-1.23894					5.88249	-0.046174
-29.47	-1.23845					5.88649	-0.04617
-29.466	-1.23881					5.89049	-0.046167
-29.462	-1.2405					5.89449	-0.046163
-29.458	-1.24231					5.89848	-0.046159
-29.454	-1.24314					5.90248	-0.046155
-29.45	-1.24731					5.90648	-0.046151
-29.446	-1.24934					5.91048	-0.046147
-29.442	-1.24942					5.91448	-0.046143
-29.438	-1.24888					5.91848	-0.04614
-29.434	-1.24826					5.92248	-0.046136
-29.43	-1.24907					5.92648	-0.046132
-29.426	-1.24912					5.93048	-0.046128
-29.422	-1.24894					5.93447	-0.046124
-29.418	-1.25317					5.93847	-0.046121
-29.414	-1.25713					5.94247	-0.046117
-29.41	-1.2559					5.94647	-0.046113
-29.406	-1.25356					5.95047	-0.046109
-29.402	-1.251					5.95447	-0.046105
-29.398	-1.25354					5.95847	-0.046102
-29.394	-1.25551					5.96247	-0.046098
-29.39	-1.2525					5.96647	-0.046094
-29.386	-1.25548					5.97047	-0.04609
-29.382	-1.25972					5.97446	-0.046087
-29.378	-1.26104					5.97846	-0.046083
-29.374	-1.26092					5.98246	-0.046079
-29.37	-1.25733					5.98646	-0.046075
-29.366	-1.25807					5.99046	-0.046072
-29.362	-1.25827					5.99446	-0.046068
-29.358	-1.25721					5.99846	-0.046064
-29.354	-1.26151					6.00246	-0.046057
-29.35	-1.26382					6.00645	-0.046049
-29.346	-1.2689					6.01046	-0.046042
-29.342	-1.27515					6.01445	-0.046035
-29.338	-1.27688					6.01845	-0.046027
-29.334	-1.28024					6.02245	-0.04602
-29.33	-1.27999					6.02645	-0.046012
-29.326	-1.27657					6.03045	-0.046005
-29.322	-1.2744					6.03445	-0.045998
-29.318	-1.27016					6.03845	-0.04599
-29.314	-1.26867					6.04245	-0.045987
-29.31	-1.27488					6.04644	-0.045983
-29.306	-1.27754					6.05045	-0.045979
-29.302	-1.27769					6.05444	-0.045976
-29.298	-1.27958					6.05844	-0.045972
-29.294	-1.28321					6.06244	-0.045969
-29.29	-1.28432					6.06644	-0.045965
-29.286	-1.28138					6.07044	-0.045962
-29.282	-1.27372					6.07444	-0.045958
-29.278	-1.27451					6.07844	-0.045954
-29.274	-1.27424					6.08244	-0.045951
-29.27	-1.27092					6.08644	-0.045947
-29.266	-1.27076					6.09044	-0.045944
-29.262	-1.26767					6.09443	-0.04594
-29.258	-1.27					6.09843	-0.045937
-29.254	-1.26995					6.10243	-0.045933
-29.25	-1.27025					6.10643	-0.04593
-29.246	-1.27457					6.11043	-0.045926
-29.242	-1.27523					6.11443	-0.045922
-29.238	-1.28163					6.11843	-0.045919
-29.234	-1.28722					6.12242	-0.045912
-29.23	-1.28754					6.12643	-0.045905
-29.226	-1.28787					6.13042	-0.045898
-29.222	-1.29136					6.13442	-0.045891
-29.218	-1.29159					6.13842	-0.045884
-29.214	-1.28683					6.14242	-0.045877
-29.21	-1.28668					6.14642	-0.04587
-29.206	-1.29198					6.15042	-0.045863
-29.202	-1.29505					6.15442	-0.045856
-29.198	-1.29526					6.15842	-0.045849
-29.194	-1.29835					6.16242	-0.045846
-29.19	-1.30398					6.16642	-0.045842
-29.186	-1.30807					6.17041	-0.045839
-29.182	-1.30356					6.17441	-0.045835
-29.178	-1.30057					6.17841	-0.045832
-29.174	-1.3002					6.18241	-0.045829
-29.17	-1.29829					6.18641	-0.045825
-29.166	-1.29743					6.19041	-0.045822
-29.162	-1.29213					6.19441	-0.045818
-29.158	-1.29633					6.19841	-0.045815
-29.154	-1.30002					6.2024	-0.045812
-29.15	-1.30202					6.20641	-0.045808
-29.146	-1.30235					6.2104	-0.045805
-29.142	-1.29797					6.2144	-0.045802
-29.138	-1.29714					6.2184	-0.045798
-29.134	-1.29634					6.2224	-0.045795
-29.1301	-1.29337					6.2264	-0.045792
-29.1261	-1.29684					6.2304	-0.045788
-29.1221	-1.29146					6.2344	-0.045785
-29.1181	-1.2907					6.2384	-0.045782
-29.1141	-1.29204					6.24239	-0.045775
-29.1101	-1.29292					6.24639	-0.045768
-29.1061	-1.29624					6.25039	-0.045762
-29.1021	-1.29817					6.25439	-0.045755
-29.0981	-1.30176					6.25839	-0.045748
-29.0941	-1.3053					6.26239	-0.045742
-29.0901	-1.30892					6.26639	-0.045735
-29.0861	-1.31115					6.27039	-0.045729
-29.0821	-1.31218					6.27439	-0.045722
-29.0781	-1.30989					6.27839	-0.045715
-29.0741	-1.31155					6.28239	-0.045712
-29.0701	-1.31155					6.28639	-0.045709
-29.0661	-1.31099					6.29038	-0.045706
-29.0621	-1.30944					6.29438	-0.045703
-29.0581	-1.30485					6.29838	-0.045699
-29.0541	-1.30042					6.30238	-0.045696
-29.0501	-1.29915					6.30638	-0.045693
-29.0461	-1.29885					6.31038	-0.04569
-29.0421	-1.30403					6.31438	-0.045687
-29.0381	-1.30642					6.31837	-0.045683
-29.0341	-1.3102					6.32238	-0.04568
-29.0301	-1.31396					6.32637	-0.045677
-29.0261	-1.31679					6.33037	-0.045674
-29.0221	-1.32051					6.33437	-0.045671
-29.0181	-1.31839					6.33837	-0.045667
-29.0141	-1.31798					6.34237	-0.045664
-29.0101	-1.31449					6.34637	-0.045661
-29.0061	-1.31594					6.35037	-0.045658
-29.0021	-1.31547					6.35437	-0.045655
-28.9981	-1.31605					6.35836	-0.045652
-28.9941	-1.31475					6.36237	-0.045645
-28.9901	-1.31692					6.36636	-0.045639
-28.9861	-1.31802					6.37036	-0.045633
-28.9821	-1.31564					6.37436	-0.045627
-28.9781	-1.31692					6.37836	-0.04562
-28.9741	-1.31808					6.38236	-0.045614
-28.9701	-1.31958					6.38636	-0.045608
-28.9661	-1.31881					6.39036	-0.045602
-28.9621	-1.31509					6.39436	-0.045595
-28.9581	-1.31821					6.39835	-0.045589
-28.9541	-1.31847					6.40236	-0.045586
-28.9501	-1.31617					6.40635	-0.045583
-28.9461	-1.31615					6.41035	-0.04558
-28.9421	-1.31977					6.41435	-0.045577
-28.9381	-1.32743					6.41835	-0.045574
-28.9341	-1.33279					6.42235	-0.045571
-28.9301	-1.33651					6.42635	-0.045568
-28.9261	-1.34141					6.43035	-0.045565
-28.9221	-1.34834					6.43435	-0.045562
-28.9181	-1.35037					6.43834	-0.045559
-28.9141	-1.34814					6.44235	-0.045553
-28.9101	-1.34612					6.44634	-0.045547
-28.9061	-1.34346					6.45034	-0.045541
-28.9021	-1.34279					6.45434	-0.045535
-28.8981	-1.33886					6.45834	-0.045529
-28.8941	-1.33314					6.46234	-0.045523
-28.8901	-1.33203					6.46634	-0.045517
-28.8861	-1.33345					6.47034	-0.045511
-28.8821	-1.33397					6.47433	-0.045505
-28.8781	-1.33426					6.47834	-0.045499
-28.8741	-1.33482					6.48233	-0.045496
-28.8701	-1.33939					6.48633	-0.045493
-28.8661	-1.34332					6.49033	-0.04549
-28.8621	-1.34492					6.49433	-0.045487
-28.8581	-1.34452					6.49833	-0.045485
-28.8541	-1.34238					6.50233	-0.045482
-28.8501	-1.34401					6.50633	-0.045479
-28.8461	-1.34118					6.51033	-0.045476
-28.8421	-1.34218					6.51432	-0.045473
-28.8381	-1.34243					6.51833	-0.04547
-28.8341	-1.3465					6.52232	-0.045464
-28.8301	-1.3502					6.52632	-0.045459
-28.8261	-1.35357					6.53032	-0.045453
-28.8221	-1.35404					6.53432	-0.045447
-28.8181	-1.35003					6.53832	-0.045441
-28.8141	-1.3468					6.54232	-0.045436
-28.8101	-1.34525					6.54632	-0.04543
-28.8061	-1.34301					6.55032	-0.045424
-28.8021	-1.34121					6.55431	-0.045418
-28.7981	-1.34226					6.55832	-0.045413
-28.7941	-1.3446					6.56231	-0.045407
-28.7901	-1.34533					6.56631	-0.045402
-28.7861	-1.34746					6.57031	-0.045396
-28.7821	-1.34886					6.57431	-0.045391
-28.7781	-1.35236					6.57831	-0.045385
-28.7741	-1.35345					6.58231	-0.045379
-28.7701	-1.35829					6.58631	-0.045374
-28.7661	-1.36168					6.5903	-0.045368
-28.7621	-1.36511					6.5943	-0.045363
-28.7581	-1.36286					6.5983	-0.045357
-28.7541	-1.36394					6.6023	-0.045354
-28.7501	-1.36522					6.6063	-0.045352
-28.7461	-1.36387					6.6103	-0.045349
-28.7421	-1.36526					6.6143	-0.045346
-28.7382	-1.36272					6.6183	-0.045344
-28.7342	-1.36273					6.6223	-0.045341
-28.7302	-1.36361					6.6263	-0.045338
-28.7262	-1.36169					6.6303	-0.045336
-28.7222	-1.36124					6.6343	-0.045333
-28.7182	-1.36064					6.63829	-0.04533
-28.7142	-1.36347					6.64229	-0.045325
-28.7102	-1.36567					6.64629	-0.045319
-28.7062	-1.36656					6.65029	-0.045314
-28.7022	-1.36725					6.65429	-0.045309
-28.6982	-1.36772					6.65829	-0.045304
-28.6942	-1.37093					6.66229	-0.045298
-28.6902	-1.37412					6.66629	-0.045293
-28.6862	-1.37629					6.67028	-0.045288
-28.6822	-1.37657					6.67429	-0.045282
-28.6782	-1.37889					6.67828	-0.045277
-28.6742	-1.3825					6.68228	-0.045272
-28.6702	-1.38583					6.68628	-0.045267
-28.6662	-1.38633					6.69028	-0.045261
-28.6622	-1.38332					6.69428	-0.045256
-28.6582	-1.38634					6.69828	-0.045251
-28.6542	-1.38716					6.70228	-0.045246
-28.6502	-1.38691					6.70628	-0.045241
-28.6462	-1.38737					6.71027	-0.045235
-28.6422	-1.38334					6.71427	-0.04523
-28.6382	-1.38608					6.71827	-0.045225
-28.6342	-1.38704					6.72227	-0.04522
-28.6302	-1.3887					6.72627	-0.045215
-28.6262	-1.3964					6.73027	-0.04521
-28.6222	-1.39963					6.73427	-0.045205
-28.6182	-1.40456					6.73827	-0.0452
-28.6142	-1.40538					6.74227	-0.045195
-28.6102	-1.40715					6.74627	-0.04519
-28.6062	-1.41181					6.75026	-0.045185
-28.6022	-1.40492					6.75427	-0.04518
-28.5982	-1.404					6.75826	-0.045175
-28.5942	-1.40282					6.76226	-0.045175
-28.5902	-1.40845					6.76626	-0.045175
-28.5862	-1.411					6.77026	-0.045175
-28.5822	-1.4123					6.77426	-0.045175
-28.5782	-1.41288					6.77826	-0.045175
-28.5742	-1.41034					6.78226	-0.045175
-28.5702	-1.41164					6.78625	-0.045175
-28.5662	-1.40991					6.79025	-0.045175
-28.5622	-1.40657					6.79425	-0.045175
-28.5582	-1.4037					6.79825	-0.045175
-28.5542	-1.40103					6.80225	-0.045564
-28.5502	-1.4031					6.80625	-0.045165
-28.5462	-1.40172					6.81025	-0.045434
-28.5422	-1.39908					6.81425	-0.049209
-28.5382	-1.39729					6.81825	-0.050021
-28.5342	-1.39791					6.82225	-0.047843
-28.5302	-1.39793					6.82624	-0.048734
-28.5262	-1.40174					6.83025	-0.04806
-28.5222	-1.4039					6.83424	-0.046413
-28.5182	-1.40651					6.83824	-0.045126
-28.5142	-1.41058					6.84224	-0.045121
-28.5102	-1.41422					6.84624	-0.045117
-28.5062	-1.41822					6.85024	-0.045112
-28.5022	-1.41894					6.85424	-0.045107
-28.4982	-1.41803					6.85824	-0.045103
-28.4942	-1.41713					6.86224	-0.04664
-28.4902	-1.41683					6.86623	-0.046202
-28.4862	-1.4199					6.87024	-0.048316
-28.4822	-1.42264					6.87423	-0.047435
-28.4782	-1.42468					6.87823	-0.049539
-28.4742	-1.42644					6.88223	-0.051228
-28.4702	-1.42771					6.88623	-0.052962
-28.4662	-1.42942					6.89023	-0.0535
-28.4622	-1.42612					6.89423	-0.053876
-28.4582	-1.42428					6.89823	-0.055449
-28.4542	-1.42032					6.90222	-0.05493
-28.4502	-1.41876					6.90622	-0.052818
-28.4462	-1.41843					6.91022	-0.052511
-28.4422	-1.41761					6.91422	-0.053914
-28.4382	-1.41765					6.91822	-0.053372
-28.4342	-1.41623					6.92222	-0.052512
-28.4302	-1.41822					6.92622	-0.05189
-28.4262	-1.42274					6.93022	-0.052419
-28.4222	-1.42339					6.93422	-0.051217
-28.4182	-1.42382					6.93822	-0.048333
-28.4142	-1.42648					6.94222	-0.045397
-28.4102	-1.42555					6.94621	-0.045002
-28.4062	-1.42442					6.95021	-0.044997
-28.4022	-1.42337					6.95421	-0.044993
-28.3982	-1.42471					6.95821	-0.044988
-28.3942	-1.42868					6.96221	-0.044984
-28.3902	-1.42887					6.96621	-0.04498
-28.3862	-1.42951					6.97021	-0.044975
-28.3822	-1.43232					6.97421	-0.044971
-28.3782	-1.43343					6.97821	-0.044967
-28.3742	-1.43459					6.9822	-0.044962
-28.3702	-1.43239					6.9862	-0.044958
-28.3662	-1.43522					6.9902	-0.044954
-28.3622	-1.43662					6.9942	-0.044949
-28.3582	-1.43773					6.9982	-0.045042
-28.3542	-1.4361					7.0022	-0.044941
-28.3502	-1.43277					7.0062	-0.044937
-28.3463	-1.43271					7.0102	-0.044932
-28.3423	-1.42859					7.0142	-0.044928
-28.3383	-1.42555					7.0182	-0.044924
-28.3343	-1.42402					7.02219	-0.04492
-28.3303	-1.42626					7.0262	-0.044916
-28.3263	-1.43211					7.03019	-0.044911
-28.3223	-1.43226					7.03419	-0.04577
-28.3183	-1.4364					7.03819	-0.047029
-28.3143	-1.44083					7.04219	-0.045818
-28.3103	-1.44385					7.04619	-0.044887
-28.3063	-1.44249					7.05019	-0.044879
-28.3023	-1.44037					7.05419	-0.04487
-28.2983	-1.44002					7.05819	-0.044862
-28.2943	-1.44656					7.06218	-0.044854
-28.2903	-1.44818					7.06618	-0.044846
-28.2863	-1.45253					7.07018	-0.044838
-28.2823	-1.45378					7.07418	-0.04483
-28.2783	-1.45464					7.07818	-0.044821
-28.2743	-1.45851					7.08218	-0.044818
-28.2703	-1.45774					7.08618	-0.044814
-28.2663	-1.45593					7.09018	-0.04481
-28.2623	-1.45164					7.09418	-0.044806
-28.2583	-1.45175					7.09818	-0.044802
-28.2543	-1.45358					7.10217	-0.046178
-28.2503	-1.45234					7.10617	-0.045709
-28.2463	-1.44732					7.11017	-0.044791
-28.2423	-1.44761					7.11417	-0.044787
-28.2383	-1.449					7.11817	-0.044783
-28.2343	-1.44749					7.12217	-0.044779
-28.2303	-1.44526					7.12617	-0.044776
-28.2263	-1.44637					7.13017	-0.044772
-28.2223	-1.44562					7.13417	-0.044768
-28.2183	-1.44483					7.13816	-0.044764
-28.2143	-1.44459					7.14216	-0.044761
-28.2103	-1.44829					7.14616	-0.044757
-28.2063	-1.45055					7.15016	-0.044753
-28.2023	-1.4525					7.15416	-0.04475
-28.1983	-1.45677					7.15816	-0.044746
-28.1943	-1.45903					7.16216	-0.044742
-28.1903	-1.45917					7.16616	-0.044739
-28.1863	-1.45765					7.17016	-0.044735
-28.1823	-1.4601					7.17416	-0.044731
-28.1783	-1.45844					7.17815	-0.044728
-28.1743	-1.4557					7.18216	-0.044724
-28.1703	-1.45865					7.18615	-0.044721
-28.1663	-1.4587					7.19015	-0.044717
-28.1623	-1.45859					7.19415	-0.044713
-28.1583	-1.45872					7.19815	-0.04471
-28.1543	-1.46178					7.20215	-0.044706
-28.1503	-1.46615					7.20615	-0.044703
-28.1463	-1.46444					7.21015	-0.044699
-28.1423	-1.46425					7.21415	-0.044696
-28.1383	-1.47158					7.21814	-0.044692
-28.1343	-1.47762					7.22215	-0.044689
-28.1303	-1.47863					7.22614	-0.044685
-28.1263	-1.47956					7.23014	-0.044682
-28.1223	-1.47737					7.23414	-0.044678
-28.1183	-1.47826					7.23814	-0.044675
-28.1143	-1.47761					7.24214	-0.044668
-28.1103	-1.4754					7.24614	-0.044661
-28.1063	-1.4788					7.25014	-0.044654
-28.1023	-1.47918					7.25413	-0.044647
-28.0983	-1.4867					7.25813	-0.044641
-28.0943	-1.49425					7.26213	-0.044634
-28.0903	-1.49726					7.26613	-0.044627
-28.0863	-1.4992					7.27013	-0.04462
-28.0823	-1.49781					7.27413	-0.044613
-28.0783	-1.49688					7.27813	-0.044607
-28.0743	-1.49419					7.28213	-0.044603
-28.0703	-1.49201					7.28613	-0.0446
-28.0663	-1.48887					7.29013	-0.044597
-28.0623	-1.48784					7.29413	-0.044594
-28.0583	-1.48626					7.29812	-0.044591
-28.0543	-1.48357					7.30212	-0.044587
-28.0503	-1.48731					7.30612	-0.044584
-28.0463	-1.49075					7.31012	-0.044581
-28.0423	-1.49417					7.31412	-0.044578
-28.0383	-1.49586					7.31812	-0.044575
-28.0343	-1.49552					7.32212	-0.044572
-28.0303	-1.49738					7.32612	-0.044568
-28.0263	-1.4969					7.33012	-0.044565
-28.0223	-1.49699					7.33411	-0.044562
-28.0183	-1.49564					7.33811	-0.044559
-28.0143	-1.49483					7.34211	-0.044556
-28.0103	-1.49856					7.34611	-0.044553
-28.0063	-1.50218					7.35011	-0.04455
-28.0023	-1.50326					7.35411	-0.044547
-27.9983	-1.50297					7.35811	-0.044544
-27.9943	-1.49976					7.36211	-0.044538
-27.9903	-1.50371					7.36611	-0.044532
-27.9863	-1.5022					7.37011	-0.044526
-27.9823	-1.49753					7.3741	-0.04452
-27.9783	-1.50013					7.3781	-0.044514
-27.9743	-1.49969					7.3821	-0.044508
-27.9703	-1.49898					7.3861	-0.044502
-27.9663	-1.5009					7.3901	-0.044496
-27.9623	-1.50568					7.3941	-0.04449
-27.9584	-1.51359					7.3981	-0.044484
-27.9544	-1.51638					7.4021	-0.044481
-27.9504	-1.5196					7.4061	-0.044478
-27.9464	-1.52487					7.4101	-0.044475
-27.9424	-1.52766					7.41409	-0.044472
-27.9384	-1.52878					7.4181	-0.044469
-27.9344	-1.52939					7.42209	-0.044467
-27.9304	-1.5308					7.42609	-0.044464
-27.9264	-1.53306					7.43009	-0.044461
-27.9224	-1.53601					7.43409	-0.044458
-27.9184	-1.53747					7.43809	-0.044455
-27.9144	-1.53644					7.44208	-0.04445
-27.9104	-1.53654					7.44609	-0.044444
-27.9064	-1.53375					7.45008	-0.044439
-27.9024	-1.53551					7.45408	-0.044433
-27.8984	-1.53366					7.45808	-0.044428
-27.8944	-1.53259					7.46208	-0.044422
-27.8904	-1.53077					7.46608	-0.044417
-27.8864	-1.53017					7.47008	-0.044411
-27.8824	-1.53124					7.47408	-0.044406
-27.8784	-1.52858					7.47808	-0.0444
-27.8744	-1.52805					7.48208	-0.044395
-27.8704	-1.53135					7.48608	-0.04439
-27.8664	-1.53724					7.49007	-0.044385
-27.8624	-1.53888					7.49407	-0.04438
-27.8584	-1.53765					7.49807	-0.044375
-27.8544	-1.54113					7.50207	-0.04437
-27.8504	-1.54363					7.50607	-0.044364
-27.8464	-1.54123					7.51007	-0.044359
-27.8424	-1.53664					7.51407	-0.044354
-27.8384	-1.5378					7.51807	-0.044349
-27.8344	-1.54532					7.52207	-0.044344
-27.8304	-1.54634					7.52607	-0.044339
-27.8264	-1.546					7.53006	-0.044334
-27.8224	-1.5515					7.53406	-0.04433
-27.8184	-1.55728					7.53806	-0.044325
-27.8144	-1.55692					7.54206	-0.04432
-27.8104	-1.55082					7.54606	-0.044315
-27.8064	-1.5476					7.55006	-0.04431
-27.8024	-1.5471					7.55406	-0.044305
-27.7984	-1.54548					7.55806	-0.044301
-27.7944	-1.54333					7.56206	-0.044296
-27.7904	-1.53985					7.56606	-0.044291
-27.7864	-1.53762					7.57005	-0.044287
-27.7824	-1.53863					7.57406	-0.044282
-27.7784	-1.5384					7.57805	-0.044278
-27.7744	-1.53542					7.58205	-0.044273
-27.7704	-1.5286					7.58605	-0.044269
-27.7664	-1.52722					7.59005	-0.044264
-27.7624	-1.52879					7.59405	-0.04426
-27.7584	-1.52471					7.59804	-0.044255
-27.7544	-1.5233					7.60205	-0.044251
-27.7504	-1.52429					7.60604	-0.044247
-27.7464	-1.52678					7.61004	-0.044242
-27.7424	-1.52703					7.61404	-0.044238
-27.7384	-1.52599					7.61804	-0.044234
-27.7344	-1.52961					7.62204	-0.04423
-27.7304	-1.53056					7.62604	-0.044225
-27.7264	-1.52687					7.63004	-0.044221
-27.7224	-1.524					7.63404	-0.044217
-27.7184	-1.52349					7.63804	-0.044212
-27.7144	-1.52544					7.64204	-0.044208
-27.7104	-1.52168					7.64603	-0.044204
-27.7064	-1.51842					7.65003	-0.0442
-27.7024	-1.51937					7.65403	-0.044196
-27.6984	-1.5177					7.65803	-0.044192
-27.6944	-1.51843					7.66203	-0.044188
-27.6904	-1.51745					7.66603	-0.044184
-27.6864	-1.52229					7.67003	-0.04418
-27.6824	-1.52725					7.67403	-0.044176
-27.6784	-1.52758					7.67803	-0.044172
-27.6744	-1.53091					7.68203	-0.044169
-27.6704	-1.53252					7.68602	-0.044165
-27.6664	-1.53119					7.69002	-0.044161
-27.6624	-1.52844					7.69402	-0.044157
-27.6584	-1.52758					7.69802	-0.044154
-27.6544	-1.52333					7.70202	-0.04415
-27.6504	-1.52006					7.70602	-0.044146
-27.6464	-1.52281					7.71002	-0.044142
-27.6424	-1.52608					7.71402	-0.044139
-27.6384	-1.52747					7.71802	-0.044135
-27.6344	-1.5251					7.72201	-0.044131
-27.6304	-1.5245					7.72601	-0.044128
-27.6264	-1.52546					7.73001	-0.044124
-27.6224	-1.52					7.73401	-0.044121
-27.6184	-1.51282					7.73801	-0.044117
-27.6144	-1.50763					7.74201	-0.044114
-27.6104	-1.50161					7.74601	-0.04411
-27.6064	-1.49904					7.75001	-0.044107
-27.6024	-1.50048					7.75401	-0.044103
-27.5984	-1.50384					7.75801	-0.044099
-27.5944	-1.50568					7.76201	-0.044096
-27.5904	-1.50498					7.766	-0.044093
-27.5864	-1.51031					7.77	-0.04409
-27.5824	-1.51629					7.774	-0.044086
-27.5784	-1.51718					7.778	-0.044083
-27.5744	-1.51695					7.782	-0.04408
-27.5705	-1.51897					7.786	-0.044076
-27.5665	-1.52131					7.79	-0.044073
-27.5625	-1.52089					7.79399	-0.04407
-27.5585	-1.51694					7.798	-0.044066
-27.5545	-1.50998					7.80199	-0.04406
-27.5505	-1.50094					7.80599	-0.044054
-27.5465	-1.49291					7.80999	-0.044048
-27.5425	-1.48781					7.81399	-0.044041
-27.5385	-1.48269					7.81799	-0.044035
-27.5345	-1.48001					7.82199	-0.044029
-27.5305	-1.48244					7.82599	-0.044023
-27.5265	-1.48866					7.82999	-0.044016
-27.5225	-1.49161					7.83398	-0.04401
-27.5185	-1.49284					7.83799	-0.044004
-27.5145	-1.49372					7.84198	-0.044004
-27.5105	-1.4929					7.84598	-0.044004
-27.5065	-1.48985					7.84998	-0.044004
-27.5025	-1.48735					7.85398	-0.044004
-27.4985	-1.48235					7.85798	-0.044004
-27.4945	-1.47865					7.86198	-0.044004
-27.4905	-1.4758					7.86598	-0.044004
-27.4865	-1.47449					7.86998	-0.044004
-27.4825	-1.47575					7.87398	-0.044004
-27.4785	-1.47578					7.87798	-0.044004
-27.4745	-1.47903					7.88197	-0.043999
-27.4705	-1.48311					7.88597	-0.043993
-27.4665	-1.48382					7.88997	-0.043988
-27.4625	-1.48136					7.89397	-0.043982
-27.4585	-1.47873					7.89797	-0.043977
-27.4545	-1.47399					7.90197	-0.043971
-27.4505	-1.47325					7.90597	-0.043966
-27.4465	-1.47194					7.90997	-0.04396
-27.4425	-1.46574					7.91397	-0.043955
-27.4385	-1.46234					7.91796	-0.043949
-27.4345	-1.46155					7.92196	-0.043945
-27.4305	-1.46088					7.92596	-0.04394
-27.4265	-1.4575					7.92996	-0.043935
-27.4225	-1.45157					7.93396	-0.04393
-27.4185	-1.45088					7.93796	-0.043925
-27.4145	-1.45273					7.94196	-0.043921
-27.4105	-1.45174					7.94596	-0.043916
-27.4065	-1.44857					7.94996	-0.043911
-27.4025	-1.44583					7.95396	-0.043906
-27.3985	-1.44397					7.95795	-0.043902
-27.3945	-1.44434					7.96195	-0.043897
-27.3905	-1.44539					7.96595	-0.043893
-27.3865	-1.44367					7.96995	-0.043889
-27.3825	-1.44079					7.97395	-0.043885
-27.3785	-1.44115					7.97795	-0.043881
-27.3745	-1.4415					7.98195	-0.043876
[truncated: 33,638 more rows]

## Sheet: Figure 7D and 7E
		Figure 7D											Figure 7E
		Number of droplets											Diameter of droplets
			WT	fld1Δ	fld1Δ + hSeipin-ΔLR	fld1Δ ldb16Δ	fld1Δ ldb16Δ + hSeipin-ΔLR						WT	fld1Δ	fld1Δ + hSeipin-ΔLR	fld1Δ ldb16Δ	fld1Δ ldb16Δ + hSeipin-ΔLR
		No. of Cells	Droplets	Droplets	Droplets	Droplets	Droplets						Diameter	Diameter	Diameter	Diameter	Diameter
		1	2	1	6	1	4					1	0.838386	1.90478	0.771015	1.38605	0.73563
		2	2	1	3	1	4					2	0.776605	1.54482	0.660265	1.3732	1.30651
		3	3	1	5	2	3					3	0.74775	1.52643	0.407282	1.33651	0.806532
		4	3	7	9	2	5					4	0.574245	1.50754	0.959169	1.32075	1.89958
		5	3	1	2	2	6					5	0.713869	1.42611	0.557306	1.31234	0.577871
		6	4	1	8	2	4					6	0.705134	1.32447	0.700022	1.27764	0.86715
		7	3	1	10	2	4					7	0.698791	1.3162	1.66626	1.27232	1.31686
		8	2	2	7	1	6					8	0.692621	1.2606	0.675311	1.26583	0.827292
		9	3	1	5	3	2					9	0.685314	1.24864	1.16693	1.2344	0.709025
		10	1	1	4	0	3					10	0.684886	1.24107	1.77335	1.20147	0.780128
		11	4	1	2	0	3					11	0.661649	1.1899	0.525253	1.17156	0.643969
		12	2	2	3	0	2					12	0.647763	1.17485	0.436859	1.14763	1.2131
		13	2	1	1	1	2					13	0.64659	1.16501	0.413646	1.12552	0.472979
		14	5	2	4	1	3					14	0.641331	1.13601	0.757312	1.10014	0.54091
		15	4	1	5	1	4					15	0.632951	1.12133	0.459175	1.08953	0.509731
		16	2	1	4	1	4					16	0.632014	1.1174	0.929171	1.07921	1.36612
		17	4	1	7	1	4					17	0.622079	1.10983	0.42517	1.04666	0.52291
		18	3	1	3	2	5					18	0.621463	1.09903	0.820579	1.03642	0.744405
		19	5	0	5	2	4					19	0.618771	1.08139	0.475388	0.995584	0.559179
		20	3	0	5	1	4					20	0.607941	1.07462	0.451817	0.967768	0.43752
		21	3	0	7	0	5					21	0.606811	1.05199	0.662041	0.913889	0.493064
		22	3	0	3	0	4					22	0.60536	1.03692	0.526221	0.896724	0.587677
		23	4	2	3	1	2					23	0.604955	1.02567	0.52885	0.886572	1.19387
		24	2	2	3	1	4					24	0.6028	1.02185	0.608278	0.876303	0.547374
		25	3	0	1	0	3					25	0.600829	1.003	0.440236	0.87558	0.84368
		26	4	1	3	1	6					26	0.598326	0.997916	0.60559	0.853976	0.80118
		27	2	0	4	0	4					27	0.592968	0.9891	0.697037	0.835631	0.481971
		28	1	1	4	1	4					28	0.592456	0.986675	0.713599	0.82416	0.616306
		29	3	0	7	2	3					29	0.590116	0.98576	0.797768	0.800706	0.821649
		30	1	3	9	1	4					30	0.586376	0.982916	0.451817	0.786096	0.513997
		31	1	1	10	1	4					31	0.58316	0.979327	0.597639	0.779311	0.956686
		32	1	0	5	1	3					32	0.582454	0.979265	0.519061	0.764299	0.758499
		33	2	1	4	0	4					33	0.576738	0.969589	1.17349	0.717238	0.724536
		34	2	1	3	2	2					34	0.575956	0.95848	0.672927	0.701403	0.533619
		35	3	0	5	1	2					35	0.575888	0.955222	0.426895	0.696482	0.598331
		36	3	2	5	0	2					36	0.574295	0.947813	0.681589	0.687043	0.661956
		37	1	1	3	1	3					37	0.574295	0.947233	0.526531	0.680234	0.638411
		38	5	2	3	3	4					38	0.564107	0.945054	0.493962	0.677321	0.559144
		39	1	1	3	2	3					39	0.563582	0.935565	0.485529	0.667024	0.705663
		40	7	0	4	0	5					40	0.563108	0.931216	1.13209	0.663755	0.509739
		41	2	1	4	0	4					41	0.563017	0.927426	0.7425	0.59958	0.513548
		42	3	1	4	0	3					42	0.561774	0.922059	0.845599	0.57742	0.429038
		43	9	1	4	2	3					43	0.561547	0.919401	0.653063	0.561429	0.549369
		44	6	1	4	0	2					44	0.557457	0.918895	0.481562	0.525404	0.501797
		45	4	1	11	1	4					45	0.556932	0.914861	0.465159	0.503101	2.18928
		46	2	2	8	1	2					46	0.555646	0.909424	0.86123	0.49131	0.535469
		47	11	1	5	2	5					47	0.555138	0.904465	0.739356	0.471607	0.686887
		48	2	1	4	1	6					48	0.552911	0.903992	0.855861	0.446901	0.850375
		49	1	1	4	3	4					49	0.548602	0.896821	0.745479	0.445465	0.405613
		50	2	2	4	1	1					50	0.546301	0.896797	0.930994	0.44314	0.503187
		51	2	2	4	2	5					51	0.543384	0.894324	0.776983	0.441559	2.17774
		52	3	2	8	1	2					52	0.533933	0.885073	0.443231	0.434977	1.79506
		53	3	1	5	2	1					53	0.533619	0.872628	0.451817	0.420927	1.60006
		54	3	1	6	1	2					54	0.533248	0.872316	0.730344	0.419323	1.07987
		55	2	0	6	0	4					55	0.529094	0.847744	0.495497	0.396398	0.728855
		56	1	0	6	2	2					56	0.528952	0.846062	0.62196	1.59311	0.69643
		57	1	0	6	1	5					57	0.528499	0.842783	0.683424	1.5229	0.684196
		58	3	1	8	1	2					58	0.525027	0.837416	0.738227	1.36552	0.646037
		59	2	1	6	2	4					59	0.522005	0.831987	0.646049	1.36388	0.62593
		60	1	1	5	1	5					60	0.521444	0.831464	0.745201	1.33651	0.623032
		61	1	1	7	2	3					61	0.520488	0.827521	0.636378	1.30632	0.60577
		62	3	1	7	3	5					62	0.510803	0.821896	0.592755	1.27435	0.603597
		63	3	1	5	2	5					63	0.506218	0.802938	0.68776	1.26181	0.599245
		64	1	1	6	1	1					64	0.505147	0.802584	0.816253	1.24687	0.575892
		65	2	0	10	1	3					65	0.505147	0.801938	0.524308	1.13789	0.530199
		66	1	0	7	1	4					66	0.503869	0.800307	0.631547	1.134	0.477749
		67	2	1	9	1	5					67	0.499567	0.785576	0.933792	1.12937	0.464958
		68	3	1	7	2	4					68	0.49717	0.784309	0.977696	1.12036	0.446213
		69	4	0	7	1	1					69	0.496838	0.781246	0.686887	1.09378	0.444445
		70	3	0	5	3	2					70	0.495017	0.765085	0.599092	0.994826	0.428235
		71	1	1	5	2	3					71	0.494213	0.75538	0.573624	0.97324	0.420014
		72	1	1	10	2	3					72	0.493978	0.753495	0.489656	0.951468	0.412096
		73	3	1	10	0	5					73	0.492177	0.692609	0.593012	0.946584	0.409866
		74	2	1	5	0	4					74	0.488915	0.676088	0.659401	0.930245	0.382922
		75	3	1	1	0	2					75	0.488057	0.662472	0.973471	0.916737	0.378576
		76	2	1	4	1	2					76	0.486375	0.642081	0.845599	0.904838	0.372781
		77	3	1	4	1	4					77	0.485695	0.633818	0.843804	0.900414	0.344828
		78	1	1	2	3	3					78	0.485233	0.624022	0.796467	0.889366	0.340997
		79	1	1	3	0	5					79	0.485205	0.621374	1.09067	0.866713	0.325266
		80	2	1	7	3	6					80	0.484893	0.613722	0.492053	0.861629	0.322446
		81	2	1	7	2	1					81	0.481409	0.604246	0.6699	0.815602	0.321717
		82	2	1	4	2	1					82	0.481409	0.58813	0.866945	0.806107	0.317577
		83	5	3	5	2	3					83	0.480413	0.568573	0.894669	0.782402	0.315448
		84	2	4	5	1	2					84	0.479141	0.55533	0.635231	0.7386	0.303247
		85	2	0	4	0	5					85	0.477582	0.527764	0.85428	0.723683	0.297694
		86	2	0	3	0	1					86	0.477405	0.519218	0.647468	0.721275	0.28357
		87	3	0	6	2	6					87	0.456876	0.511321	0.444932	0.717605	0.282483
		88	6	1	4	0	4					88	0.456772	0.502997	0.682416	0.678648	0.275844
		89	7	1	4	0	5					89	0.452362	0.490735	0.72895	0.671221	0.262685
		90	2	4	7	1	7					90	0.451285	0.484072	1.02107	0.652536	0.259653
		91	3	1	6	1	5					91	0.446491	0.483037	0.545507	0.646322	0.257011
		92	5	1	1	1	3					92	0.444517	0.481029	0.905698	0.583915	0.254937
		93	3	2	2	1	4					93	0.442805	0.465812	0.856108	0.564367	0.241268
		94	3	3	1	1	6					94	0.436531	0.460542	0.686266	0.525975	0.220313
		95	4	1	4	1	6					95	0.410475	0.450101	0.627283	0.514402	0.212013
		96	1	1	4	1	1					96	0.408938	0.442206	0.669737	0.501867	0.205406
		97	2	1	2	2	6					97	0.397736	0.436441	0.753857	0.478938	0.203291
		98	2	1	5	1	2					98	0.394628	0.409804	0.852354	0.464262	0.201118
		99	5	1	3	0	5					99	0.39458	0.402215	0.790838	0.456342	0.194813
		100	5	0	4	0	3					100	0.390445	0.393828	0.501921	0.444759	0.182769

[truncated: 3 more sheets: Figure 8C, Figure S5B graph RAW, Figure S5C graph RAW]
